1 **Urbanization promotes specific bacteria in freshwater microbiomes including potential**  
2 **pathogens**

3

4 **Running title:** Urbanization affects freshwater microbiomes

5

6 Daniela Numberger<sup>1,2,#+</sup>, Luca Zoccarato<sup>2+</sup>, Jason Woodhouse<sup>2</sup>, Lars Ganzert<sup>2,3,4</sup>, Sascha Sauer<sup>5</sup>, Hans-  
7 Peter Grossart<sup>2,6,7\*</sup>, Alex Greenwood<sup>1,8</sup>

8

9 **1** Leibniz Institute for Zoo and Wildlife Research, Alfred-Kowalke-Strasse 17, 10315 Berlin, Germany

10 **2** Leibniz Institute of Freshwater Ecology and Inland Fisheries, Alte Fischerhütte 2, 16775 Stechlin, Germany

11 **3** GFZ German Research Centre for Geosciences, Helmholtz Centre Potsdam, Section 3.7 Geomicrobiology,  
12 Telegrafenberg C-422, 14473 Potsdam, Germany

13 **4** UiT - The Arctic University of Norway, Faculty of Biosciences, Fisheries and Economics, Marbio, Breivika,  
14 N-9037 Tromsø, Norway

15 **5** Max Delbrück Center for Molecular Medicine in the Helmholtz Association, 16775, 13125 Berlin, Germany

16 **6** University of Potsdam, Institute of Biochemistry and Biology, Karl-Liebknecht-Strasse 24-25, 14476 Potsdam,  
17 Germany

18 **7** Berlin-Brandenburg Institute of Advanced Biodiversity Research (BBIB), Altensteinstrasse 32, 14195 Berlin,  
19 Germany

20 **8** Freie Universität Berlin, Department of Veterinary Medicine, Institute for Virology, Robert von Ostertag-  
21 Strasse 7-13, 14163 Berlin, Germany

22 + Daniela Numberger and Luca Zoccarato contributed equally to this work

23 # present address: Institute for Microbiology, University of Veterinary Medicine Hannover, Foundation,  
24 Bischofsholer Damm 15, 30173 Hannover, Germany

25

26 **\*Correspondence:**

27 Professor **Hans-Peter Grossart**, Leibniz Institute of Freshwater Ecology and Inland Fisheries, Alte Fischerhütte  
28 2, 16775 Stechlin, Germany, Phone: +49 33082 69991, Fax: +49 33082 69917, E-mail: [hgrossart@igb-berlin.de](mailto:hgrossart@igb-berlin.de)

29 **ABSTRACT**

30 Freshwater ecosystems are characterized by complex and highly dynamic microbial communities that  
31 are strongly structured by their local environment and biota. Growing city populations and the process  
32 of urbanization substantially alter freshwater environments. To determine the changes in freshwater  
33 microbial communities associated with urbanization, full-length 16S rRNA gene PacBio sequencing  
34 was performed from surface water and sediments from a wastewater treatment plant, urban and rural  
35 lakes in the Berlin-Brandenburg region, Northeast Germany. Water samples exhibited highly habitat  
36 specific bacterial communities with multiple genera showing clear urban signatures. We identified  
37 potentially harmful bacterial groups associated with environmental parameters specific to urban  
38 habitats such as *Alistipes*, *Escherichia/Shigella*, *Rickettsia* and *Streptococcus*. We demonstrate that  
39 urbanization alters natural microbial communities in lakes and, via simultaneous eutrophication,  
40 creates favorable conditions that promote specific bacterial genera including potential pathogens. Our  
41 findings are of global relevance highlighting a long-term health risk in urbanized waterbodies, at a  
42 time of accelerated global urbanization. The results demonstrate the urgency for undertaking  
43 mitigation measures such as targeted lake restoration projects and sustainable water management  
44 efforts.

45

46 **Keywords:** Urbanization, urban waters, wastewater, microbial ecology, freshwater

47

48

49

50

51

52

53

## 54 **1. Introduction**

55 Expansion rates of urban land areas are higher than or equal to population growth rates resulting in  
56 more expansive urban land-use than compact urban growth (Seto et al., 2011). The process of  
57 urbanization leads to changes in land-cover and -use, hydrological systems, local climate and  
58 biodiversity (Grimm et al., 2008). Strong increases in urbanization are predicted over the coming  
59 decades (Gardner et al., 2016; Seto et al., 2011). While urban land areas increased by 58,000 km<sup>2</sup>  
60 worldwide from 1970 to 2000, an average increase of 1,527,000 km<sup>2</sup> is predicted by 2030 (Seto et al.,  
61 2011). High population density challenges freshwater hygiene and consequently human health  
62 (McLellan et al., 2015; Vörösmarty et al., 2000; Walters et al., 2011). Anthropogenic activities, such  
63 as the introduction of sewage water, and with that faecal bacteria, into natural water systems, cause  
64 eutrophication and other forms of pollution that may alter the natural microbial community  
65 composition in aquatic systems. These new microbial communities may also favour the proliferation  
66 of pathogens, whereas natural communities in nutrient-poor waters may greatly restrict such pathogen  
67 growth (Wang et al., 2013). The increasing frequency and dominance of toxic cyanobacterial blooms,  
68 but also other pathogens in parallel to anthropogenic eutrophication, pollution and warming, is of  
69 particular concern because they can directly affect human and animal health (Lapointe et al., 2015;  
70 Walters et al., 2011; Zinia and Kroeze, 2015). Further research is necessary to fully understand, how  
71 and to what extent human activities impact microbiomes of freshwater systems (Hall et al., 1999;  
72 Ibekwe et al., 2016; McLellan et al., 2015; Newton et al., 2015; Rizzo et al., 2013).

73 Wastewater treatment plants (WWTPs) serve the principle function of maintaining water hygiene by  
74 greatly reducing nutrients and pathogenic or harmful microorganisms (Al-Jassim et al., 2015; Asano  
75 and Levine, 1996; Numberger et al., 2019a; Wakelin et al., 2008). However, WWTPs still represent  
76 one of the major sources of freshwater pollution by dispersing pathogenic and antibiotic-resistant  
77 microbes or pharmaceuticals into the environment (Behera et al., 2011; Tahrani et al., 2015).  
78 Wastewater effluents strongly contribute to the humanization of natural microbial communities,  
79 resulting in modified water communities that contain microbes of human origin and partly resemble  
80 enteric microbiomes (McLellan et al., 2015; Newton et al., 2015; Wakelin et al., 2008). Urban lakes

81 that are not affected by treated wastewater, remain susceptible to anthropogenic influence associated  
82 with intense recreational activity and urban storm water inflow (Newton et al., 2011; Zwart et al.,  
83 2002). Rural lakes, when not influenced by agricultural activities and other anthropogenic land-use,  
84 should exhibit natural bacterial communities, where spatio-temporal variability may be in response to  
85 environmental factors such as differences in temperature, pH, calcium carbonate and nutrient content,  
86 and organic matter availability (Allgaier and Grossart, 2006a, 2006b; Bloem et al., 1989; Güde, 1991;  
87 Newton et al., 2011; Zwart et al., 2002).

88 Urbanization can create conditions, which are favourable for the proliferation of pathogenic microbes.  
89 This might increase the likelihood that such pathogens may emerge (Andersson et al., 1997; Clark et  
90 al., 1996; Hunter, 2003). For example, human-introduced (micro)plastics can serve as a preferential  
91 habitat for pathogens by enabling biofilm formation in freshwater (Kirstein et al., 2016; Viršek et al.,  
92 2017). In addition, urban areas experience higher temperatures than their rural surrounding landscapes,  
93 e.g. 4.6 °C difference in the mean air temperature in the city of Beijing (Armson et al., 2012;  
94 Sundborg, 1950; Tan et al., 2010). Also, higher water temperatures are known to stimulate growth of  
95 some pathogenic bacterial species (Baker-Austin et al., 2013; Charron et al., 2004; Hunter, 2003).  
96 Moreover, in urban areas, water can be easily contaminated with pathogens by humans and pets during  
97 recreational activity (Elmir et al., 2007; Gerba, 2000; Plano et al., 2011), wildlife (Babudieri, 1958;  
98 Markwell and Shortridge, 1982), storm water runoff (Kupek et al., 2000; Schillinger and Gannon,  
99 1985; Ward, 2002), agriculture (Givens et al., 2016; Walters et al., 2011) and wastewater effluents  
100 (Cai and Zhang, 2013; Numberger et al., 2019a; Steyer et al., 2015). Although there are hints that lake  
101 trophy and anthropogenic activity drive microbial community composition and function (Kiersztyn et  
102 al., 2019), it remains unclear which specific bacterial groups are indicative for increasing urbanization  
103 and hence may serve as indicators for environmental and human health risks.

104 Best practice for identifying pathogenic organisms in aquatic environments remains the utilisation of  
105 selective culture media, or molecular detection by qPCR targeting specific markers of pathogenicity  
106 (Aw and Rose, 2012; Numberger et al., 2019b). Such approaches are typically laborious, requiring  
107 multiple assays targeting distinct pathogens. Furthermore, these techniques presume a specific target

108 and do not provide an overview on which bacteria are present. In contrast, while amplicon sequencing  
109 has been proposed as a more cost-effective method for profiling microbial communities for the  
110 presence of potentially pathogenic organisms, the obtained short-read sequences make classification to  
111 the genus level might not be that efficient than with full-length sequences (Buccheri et al., 2019).  
112 Several studies have proposed additional specific primer pairs, or increasing the number of targeted  
113 variable regions (Wang and Jia, 2016) for improved bacterial community structure determination, but  
114 these suffer from the same pitfalls for detection of bacterial pathogens. In contrast, full-length  
115 sequencing of the 16S ribosomal RNA gene, together with bioinformatic tools for determining single  
116 nucleotide variants may provide both a comprehensive profile of the microbial community and a  
117 taxonomic resolution that in many cases reaches species level (Buccheri et al., 2019; Conlan et al.,  
118 2012). Thus, this approach would offer a more precise and robust screening tool for pathogen  
119 detection in water bodies and effective monitoring of indicator species for anthropogenic pollution.

120 To evaluate urbanization impacts on aquatic microbial community structure, we sampled a wastewater  
121 treatment plant, three urban and two rural lakes in the Berlin-Brandenburg region (Germany) at four  
122 time points over a year. The Berlin-Brandenburg area serves as a model region as it offers a steep  
123 gradient of urbanization from a densely populated and growing city (ca. 3.7 Mio. inhabitants) to a  
124 hinterland with one of the lowest population densities in Germany (85 people per km<sup>2</sup>). The  
125 wastewater treatment plant treats 247,500 m<sup>3</sup> raw wastewater per day generated by 1.6 million  
126 inhabitants of Berlin. The three urban lakes are classified as eutrophic and located in the German  
127 capital Berlin and the small city Feldberg in Mecklenburg-Vorpommern. The two rural lakes are  
128 located in an area in Brandenburg surrounded by forests. Their oligo-mesotrophic-eutrophic state and  
129 their undeveloped shore line together with very low population densities led us to define them as  
130 “rural lakes”. Our study combined for the first time full-length 16S rRNA gene sequencing using the  
131 PacBio Sequel I platform (Mosher et al., 2014) with the DADA2 pipeline to characterize the  
132 composition of natural microbial communities at high phylogenetic resolution, to identify bacterial  
133 groups associated with urbanization and use them as indicator species for health risk assessments.

134

## 135 **2. Material and Methods**

### 136 **2.1 Sampling**

137 The lakes Müggelsee and Weisser See in Berlin (capital of Germany with an area of 891.1 km<sup>2</sup> and 3.7  
138 Mio inhabitants) and Feldberger Haussee in the small city Feldberg in Mecklenburg-Vorpommern  
139 (pronounced anthropogenic impact due to previous wastewater input (Krienitz et al., 1996)) are  
140 comparable to lakes in bigger cities and were selected as urban lakes. None of the urban lakes received  
141 direct wastewater input during the sampling period. The two rural lakes, Dagowsee and Stechlinsee  
142 are located in a forested nature reserve area in Northern Brandenburg and have little anthropogenic  
143 impact, surrounded by only 383 inhabitants of the villages of Dagow and Neuglobsow. All lakes  
144 originate from the last ice age, but greatly vary in their present environmental status. Untreated raw  
145 inflow water and treated outflow of 1.6 million Berlin inhabitants were sampled from a municipal  
146 wastewater treatment plant (WWTP) in Berlin (Germany). This WWTP processes a negligible amount  
147 of industrial wastewater. The exact location of the sampled WWTP cannot be disclosed due to a  
148 confidentiality agreement with the WWTP operators. The characteristics of all five lakes and the  
149 wastewater treatment plant are shown in Table A.1.

150 Wastewater inflow and outflow, lake surface water, and sediment samples were collected every three  
151 months in 2016 from two locations in the small Lake Weißer See and three different locations in the  
152 other four selected lakes in Northeast Germany (Fig. A.1). Water was collected within a depth of 0.5  
153 m in 2 L plastic bottles and filtered within 4 h in the lab through 0.22 µm Sterivex® filters (EMD  
154 Millipore, Darmstadt, Germany) connected to a peristaltic pump (EMD Millipore, Germany). In  
155 addition, the first centimetre of sediment was sampled using a plexiglass tube (length 50 cm, Ø 44  
156 mm). After slicing the sediment cores in the field, samples were frozen within 2 h at -20°C until DNA  
157 extraction in the lab.

### 158 **2.2 Measurement of nutrients and dissolved organic carbon**

159 Due to logistic, treatment and handling challenges, measurements of environmental parameters were  
160 only successfully performed from surface lake water. Temperature and pH were measured with a

161 digital thermometer (Carl Roth, Germany) and pH multimeter EC8 (OCS.tec GmbH & CO. KG,  
162 Germany), respectively. For measurement of orthophosphate, nitrate, nitrite, ammonium and dissolved  
163 organic carbon (DOC), 200 mL water were filtered through 0.45  $\mu\text{m}$  cellulose acetate filters (Sartorius  
164 Stedim Biotech GmbH, Göttingen, Germany) after rinsing the filters with 1 mL of distilled water. The  
165 filtrate was frozen at  $-20^{\circ}\text{C}$  prior to analyses. Dissolved nutrients were analysed  
166 spectrophotometrically using a flow injection analyzer (FOSS, Hilleroed, Denmark), while DOC was  
167 analysed with a Shimadzu TOC-5050 total organic carbon analyser (Duisburg, Germany). All analyses  
168 were conducted according to Wetzel and Likens (Wetzel and Likens, 1991).

### 169 **2.3 DNA extraction**

170 The QIAamp DNA mini kit (Qiagen, Hilden, Germany) was used for DNA extraction from Sterivex®  
171 filters (EMD Millipore, Darmstadt, Germany) following the protocol for tissue with some  
172 modifications. Prior to extraction the filters were cut into small pieces and placed into a 2 mL tube.  
173 After the addition of 200  $\mu\text{m}$  low-binding zirconium glass beads (OPS Diagnostics, NJ, USA) and 360  
174  $\mu\text{L}$  of buffer ATL, the samples were vortexed for 5 min at 3,000 rpm with an Eppendorf MixMate®  
175 (Eppendorf, Hamburg, Germany). For lysis, 40  $\mu\text{L}$  of Proteinase K was added and incubated at  $57^{\circ}\text{C}$   
176 for 1 h. Then, the samples were centrifuged for 1 min at 11,000 rpm and the supernatant was  
177 transferred to a new 2 mL tube. The extraction was then continued following the manufacturer's  
178 protocol. DNA from sediment samples was extracted using the NucleoSpin® Soil kit (Macherey  
179 Nagel, Düren, Germany), according to the manufacturer's instructions.

### 180 **2.4 Amplification of the full-length 16S rRNA genes**

181 For each sample a unique symmetric set of 16 bp barcodes designed by Pacific Biosciences (CA,  
182 USA) was coupled with the primers (27F: 5'-AGRGTTYGATYMTGGCTCAG-3' and 1492R: 5'-  
183 RGYTACCTTGTTACGACTT-3'). PCR was performed in a total volume of 25  $\mu\text{L}$ , containing 12.5  
184  $\mu\text{L}$  MyFi™ Mix (Bioline, London, UK), 9.3  $\mu\text{L}$  water, 0.7  $\mu\text{L}$  of 20  $\text{mg mL}^{-1}$  bovine serum albumin  
185 (New England Biolabs, MA, USA), 0.75  $\mu\text{L}$  of each primer (10  $\mu\text{M}$ ), and 1  $\mu\text{L}$  of DNA. The PCR  
186 reaction included the following steps:  $95^{\circ}\text{C}$  for 3 min, 25 cycles of  $95^{\circ}\text{C}$  for 30 s,  $57^{\circ}\text{C}$  for 30 s and  
187  $72^{\circ}\text{C}$  for 60 s with a final elongation step at  $72^{\circ}\text{C}$  for 3 min. The concentration and quality of 16S

188 rRNA gene amplicons were measured using a TapeStation 4200 system with D5000 tapes and  
189 reagents (Agilent Technologies, CA, USA). Equimolar pools of samples were generated before  
190 sequencing. Three PCR samples containing 1  $\mu$ L MilliQ water instead of sample DNA were added as  
191 negative controls and used to remove ASVs (amplicon sequence variants) representing possible  
192 laboratory contaminants from the analyzed sequences (7 unique ASVs representing 0.4% of the total  
193 sequences).

## 194 **2.5 Library preparation, purification and sequencing**

195 Samples were purified with the Agencourt AMPure XP kit (Beckman Coulter, USA) and sequencing  
196 libraries including DNA damage repair, end-repair and ligation of hairpin adapters were prepared  
197 using the SMRTbell Template Prep Kit 1.0-SPv3 following the instructions in the amplicon template  
198 protocol (Pacific Biosciences, USA). The Sequel Binding Kit 2.0 (Pacific Biosciences, USA) was used  
199 to bind DNA template libraries to the Sequel polymerase 2.0. The data for each sample were collected  
200 in a single Sequel SMRT Cell 1M v2 with 600 min movie time on the Sequel system I (Pacific  
201 Biosciences, USA). The Diffusion Loading mode was used in combination with a 5 pM on-plate  
202 loading concentration on the Sequel Sequencing Plate 2.0 (Pacific Biosciences, USA). The SMRT  
203 Analysis Software (Pacific Biosciences, USA) generated Circular Consensus Sequences (CCS) for  
204 each multiplexed sample that was used for further downstream analyses.

## 205 **2.6 Bioinformatics and statistics**

206 All 13 SMRT cells together generated 2.4 M subreads with an average length of ~25 kb and a mean of  
207 17 passes of the 16S rRNA gene (expected length of ~1.5 kb). Circular consensus sequences (CCS) for  
208 multiplexed samples were generated from the subreads using pbcss v3.4  
209 (<https://github.com/PacificBiosciences/ccs>) with `-minPredictedAccuracy` of 0.99 and sample  
210 demultiplexing was performed using lima v2.0.0 (<https://github.com/pacificbiosciences/barcoding/>)  
211 with the parameters `--same`, `--ccs` and `--min-score 80`. Removal of primers was carried out using  
212 Cutadapt (Martin, 2011) while additional quality filtering, trimming, and identification of unique  
213 amplicon sequence variants (ASVs) was performed using the DADA2 pipeline in R (Callahan et al.,



214 2016, p. 2). As DADA2 relies on a minimum amount of sequence replication to infer the “true”  
215 sequence variants, we had to further trim the CCS because when pooling all ~2.4 M CCS together,  
216 only 1.6% of the original CCS was found to be duplicated. CCS were trimmed using different  
217 combinations of hypervariable primers of the 16S rRNA gene aiming to retain the highest number of  
218 sequences in the final ASV table while losing the minimum number of bases (Table A.2). The CCS  
219 were trimmed at the 5’ end using the forward V2 primer (ACTCCTACGGGGAGGCAGCA) which  
220 led to an average length of 1,123 bp (versus 1,443 bp of the untrimmed CCS), 4.4% of sequence  
221 duplication and the retention of 2 M sequences in the final ASV table (Table B.1). The taxonomic  
222 classification of the ASV table was performed with SINA v1.7.2 against the SILVA reference  
223 database (SSU NR 99 v138.1) (Pruesse et al., 2012; Quast et al., 2013; Yarza et al., 2014) and ASVs  
224 assigned as “Chloroplast” removed. All down-stream analyses were performed in R v4.1.0 (R Core  
225 Team, 2013).

226 Weighted correlation network analysis (WGCNA package (Langfelder and Horvath, 2008)) was  
227 carried out to identify modules of the bacterial community enriched in potential pathogenic taxa.  
228 Briefly, any noisy signal from rare ASVs was removed from the ASV table by retaining only ASVs  
229 which occurred with 10 or more sequences in at least 3 samples (this step removed 4670 and 3287  
230 ASVs, representing 9.5% and 20% of total sequence abundance in water and sediment samples,  
231 respectively). An adjacency matrix was computed using the function *adjacency* on the centred log-  
232 ratio transformed ASV sequence counts (*clr* function, package *compositions*; (Parent and Parent,  
233 2015)) to ensure sub-compositional coherence. The function infers ASVs connectivity by calculating  
234 an ASV similarity matrix (based on Pearson correlation) and applying soft thresh-holding to  
235 empathize the strongest correlations. The soft threshold value 5 was picked with the function  
236 *pickSoftThreshold* as it was the smallest value achieving a  $R^2 > 0.9$  for a scale-free topology fit.  
237 Topological overlap dissimilarity was calculated with the function *TOMdist* on the adjacency matrix  
238 and fed into a hierarchical clustering (*hclust* function, Ward.D2 agglomeration method). ASV modules  
239 were automatically identified on the clustering by mean of the function *cutreeDynamic* to identify  
240 branch boundaries for modules (*deepSplit* = 4 and *minClusterSize* = 20). The ASV modules were  
241 summarized by their first principal component (function *moduleEigengenes*) which was correlated

242 with vectors of relative abundance of the potential pathogenic groups to identify ASV modules  
243 significantly enriched in those groups. The vectors of potential pathogens were obtained by summing  
244 the relative abundance of the ASVs classified as belonging to either one of the potential pathogenic  
245 taxa (according to NCBI Pathogen Detection Project, see  
246 <http://www.ncbi.nlm.nih.gov/projects/pathogens/>) across all samples and transformed using centred  
247 log-ratio. Enrichment and *p*-values were obtained from a univariate regression model between each  
248 module principal component and each vector of potential pathogens and results were visualized as a  
249 heatmap.

250 Ternary plots were plotted/generated using the function *ggtern* (package *ggtern*; (Hamilton and Ferry,  
251 2018)) while an indicator species analysis was carried out by mean of the *multipatt* function (func =  
252 "*IndVal.g*", duleg = F, max.order = 2; package *indicspecies*) to identify ASVs specifically associated  
253 to each of the habitats (i.e. wastewater, urban and rural lakes) and their combination (Cáceres et al.,  
254 2010; Cáceres and Legendre, 2009). Only ASVs with a *p*-value adjusted for false discovery rate < 0.05  
255 were considered.

256 Non-metric multidimensional scaling (NMDS) analyses were generated by the function *metaMDS()*  
257 using package *vegan* in R version 3.5 and Bray-Curtis dissimilarity index. Constrained correspondence  
258 analyses (CCA) were also performed in R using the package *vegan* and the function *cca()* followed by  
259 an one-way analysis of variance (ANOVA) with the function *anova()* and 'n perm=999' (Dixon, 2003;  
260 Oksanen et al., 2014; R Core Team, 2013). Boxplots were created by using the R packages *ggplot2*  
261 and *ggsignif* with Wilcoxon test for the significance levels (Ahmann-Eltze, 2017; Wickham, 2009).

262

### 263 **3. Results**

#### 264 **3.1 Between and among lake bacterial community heterogeneity**

265 Surface water samples were dominated by Gammaproteobacteria ( $32.9 \pm 13.2\%$ ), Cyanobacteria ( $14.9$   
266  $\pm 18.7\%$ ), Bacteroidota ( $11.7 \pm 5.8\%$ ), Actinobacteriota ( $11.4 \pm 8.2\%$ ) and Alphaproteobacteria ( $10.8$   
267  $\pm 4.9\%$ ), Planctomycetota ( $8.8 \pm 8.0\%$ ) and Verrucomicrobiota ( $5.7 \pm 3.1\%$ ). The most abundant phyla

268 in the sediment samples were Gammaproteobacteria ( $44.1 \pm 7.9\%$ ), Bacteroidota ( $16.7 \pm 4.5\%$ ),  
269 Alphaproteobacteria ( $8.2 \pm 3.4\%$ ), Cyanobacteria ( $5.1 \pm 4.2\%$ ), Verrucomicrobiota ( $6.0 \pm 2.9\%$ ),  
270 Planctomycetota ( $3.4 \pm 1.8\%$ ) and Acidobacteriota ( $3.1 \pm 1.1\%$ ).

271 Non-metric multidimensional scaling (NMDS) analyses of the lakes were performed to display  
272 seasonal or spatial heterogeneity within a lake. In each lake two main clusters could be defined: water  
273 and sediment. Furthermore, water samples showed a higher variance than the sediment samples, which  
274 were more similar to each other, except for Müggelsee. Among the water samples we observed a  
275 clustering of samples by season, whereas the sediment samples revealed either random (no clear  
276 pattern) or spatial patterns according to the sampling site (Fig. A.2).

277 Environmental parameters and nutrients were measured in surface water samples and used to detect  
278 any significant correlations with the bacterial communities/groups. A constrained correspondence  
279 analysis (CCA) of the surface water samples in combination with an analysis of variance (ANOVA)  
280 showed that temperature, pH, orthophosphate, nitrate, nitrite, ammonium and dissolved organic carbon  
281 (DOC) concentration had a significant (all  $p \leq 0.001$ ) correlation with the composition of the lake  
282 bacterial communities (**Fig. 1a**). Overall, temperature ( $\chi^2 = 0.4219$ ) and orthophosphate concentration  
283 ( $\chi^2 = 0.3594$ ) had the strongest correlation with the community composition. Nitrate, orthophosphate  
284 and temperature displayed a stronger correlation with urban lake than with rural lake samples. Among  
285 the most abundant bacterial phyla, Alphaproteobacteria and Bacteroidota showed a positive correlation  
286 with temperature. However, the CCA only explained 10.7% of the total variance (**Fig. 1b**).

287

### 288 **3.2 Habitat-specific bacterial communities in rural and urban freshwater habitats**

289 Lakes were generally characterized by significantly higher fractions (relative abundance) of  
290 Actinobacteriota, Alphaproteobacteria, Planctomycetota and Verrucomicrobiota, while wastewater had  
291 significantly higher levels of Firmicutes and Gammaproteobacteria (without the order  
292 Burkholderiales) (**Fig. 2**). Urban lakes differed significantly from rural lakes by having higher relative

293 abundances of Actinobacteria, Alphaproteobacteria, Burkholderiales and Firmicutes. The Bacteroidota  
294 were significantly higher in the wastewater outflow and lakes than in the wastewater inflow.

295 Among all defined ASVs from water, sediment and wastewater samples (total = 6712 ASVs) 15.9%  
296 were shared between all three habitats, i.e. wastewater, urban and rural lakes (**Fig. 3**). 4.1% of ASVs  
297 were unique to wastewater, 5.9% were unique to urban lakes and 7.2% were unique to rural lakes.  
298 Wastewater shared 3.9% of the ASVs with urban lakes and only 0.3% with rural lakes, while urban  
299 and rural lakes shared 62.7% of ASVs.

300 The ternary plots (**Fig. 4**) revealed the distribution of all ASVs of the most abundant bacterial taxa in  
301 the three different habitats: rural lake water, urban lake water and wastewater. We excluded the  
302 sediment from this analysis to allow for a direct comparison between lake water and wastewater  
303 samples.

304 Wastewater and rural lakes shared only very few ASVs among all dominant phyla. Most ASVs were  
305 shared between rural and urban lakes, except for the phylum Firmicutes that showed the highest  
306 prevalence of unique ASVs in wastewater samples followed by shared ASVs between wastewater and  
307 urban lakes (e.g. ASVs belonging to the genera *Acinetobacter*, *Bacteroides*, *Bifidobacterium* and  
308 *Enterococcus*). The Actinobacteriota and Gammaproteobacteria had several ASVs unique to urban  
309 water and several shared between urban and rural lake water. All bacterial phyla showed higher  
310 numbers of ASVs in urban lake water than in rural lake water alone. An indicator species analysis  
311 (ISA) identified in total 32 ASVs as significant indicators for urban water (urban lakes and  
312 wastewater) including the genera *Acidovorax* (Burkholderiales), *Flavobacterium* (Bacteroidota) and  
313 *Pseudomonas* (Gammaproteobacteria) (Table C.1).

### 314 **3.3 Bacterial genera that include known potential pathogens**

315 The prevalence of the most relevant genera which include species that are known human pathogens are  
316 shown in **Fig. 5a**. While some of the genera such as *Aeromonas*, *Clostridium* and *Pseudomonas* were  
317 equally prevalent in all lakes and wastewater, other genera such as *Alistipes*, *Enterococcus*,  
318 *Escherichia/Shigella* and *Streptococcus* showed a higher prevalence in urban water including

319 wastewater. Furthermore, in some cases the relative abundance was significantly higher in the  
320 sediment than in water, for instance for the genera *Bacillus* and *Clostridium* (Fig. A.3). Other taxa  
321 such as *Legionella*, *Leptospira*, *Microcystis*, *Mycobacterium* and *Peptoclostridium* had a significantly  
322 higher abundance in water samples (Fig. A.3). A weighted correlation network analyses (WGCNA)  
323 identified 15 bacterial sub-communities for water and 17 sub-communities for sediment samples that  
324 were significantly enriched with bacterial genera containing potential pathogenic species (**Fig. 5b**).  
325 Most of these sub-communities did not show a significant correlation with one of the sampled  
326 environments, but some of the communities were significantly associated with one specific habitat,  
327 e.g. urban waters. The genera *Microcystis*, *Peptoclostridium* and *Pseudomonas* were enriched in a  
328 water sub-community that was significantly associated with urban lakes. The same was true for  
329 *Acinetobacter*, *Aeromonas*, *Escherichia/Shigella*, *Klebsiella*, *Enterococcus* and *Leptospira*. Sediment  
330 sub-communities that were significantly enriched in urban lakes showed a higher prevalence of  
331 *Aeromonas*, *Clostridium*, *Escherichia/Shigella* and *Streptococcus*. Composition of sub-communities as  
332 well as their prevalence in the samples are shown in Fig. A.4. No significant correlation was found  
333 between potential pathogenic groups and sub-communities that were only present in rural waters.  
334 However, rural sediments harbour sub-communities that favour the presence of *Klebsiella*, *Leptospira*,  
335 *Microcystis* and *Pseudomonas*.

336 A CCA analysis revealed the correlation between potential pathogenic genera (relative abundance) and  
337 the measured environmental parameters in lake surface water (**Fig. 6**). All parameters, except nitrite  
338 concentration, were significant (one-way ANOVA, p-value 0.002 for nitrate and <0.001 for all other  
339 parameters) and, while most bacterial groups were positively correlated with nitrate and temperature,  
340 other groups, e.g. *Microcystis* showed a clear correlation with orthophosphate and *Legionella* with  
341 DOC.

342

#### 343 **4. Discussion**

344 Urbanization represents a multifaceted stressor that impacts the quality and function of freshwater  
345 systems, promoting eutrophication (Lapointe et al., 2015; Taylor et al., 2004) and contributing to the

346 accumulation of emerging pollutants (Pal et al., 2010; Zinia and Kroeze, 2015). Eutrophication has  
347 long been recognised as a major driver affecting microbial community composition. High loads of  
348 organic matter lead to increased bacterial activity and creates opportunities for the proliferation of  
349 copiotrophs, including many potential pathogens (Smith and Schindler, 2009; Wu, 1999).  
350 Eutrophication, however, is not strictly an urban problem. Rural lakes, particularly in close proximity  
351 to agricultural land, can also be affected by increased nutrient input. Our results revealed significant  
352 differences in the microbial community composition of rural and urban lakes (both water and  
353 sediment), and wastewater. Sampled urban lakes, though not directly connected to wastewater  
354 effluents, showed a higher similarity to wastewater samples than rural lakes indicating anthropogenic  
355 pollution occurs independently of WWTPs. Urban lakes shared 13-fold more ASVs with wastewater  
356 than rural lake did (**Fig. 4**). Sewage generally reflects the human faecal microbiome (Newton et al.,  
357 2015), suggesting urbanization might have led to a humanization of freshwater bacterial communities  
358 (McLellan et al., 2015). In addition, it is known that bathers/swimmers release bacteria from their skin  
359 during recreational water activity (Elmir et al., 2007; Plano et al., 2011) and animal or human urine  
360 could also be a source of bacterial contamination (Lewis et al., 2013; Rojas et al., 2010).

361 The presence of habitat specific bacterial communities was supported for wastewater, urban and rural  
362 lake water (**Fig. 5a**). The observed differences between rural and urban lake communities appear to be  
363 mainly driven by the prevalence of specific dissolved nutrients (**Fig. 2a**). Increased availability of  
364 orthophosphate and ammonium coincided with an increase in the relative abundance of most bacterial  
365 phyla in urban lakes, particularly the Actinobacteriota, Alphaproteobacteria, Bacteroidota, Firmicutes  
366 and Gammaproteobacteria (**Fig. 3**). The diversity (according to the Chao index) was significantly  
367 higher in urban lakes for Actinobacteriota, Bacteroidota and Firmicutes (Fig. A4).

368 Actinobacteriota and Alphaproteobacteria are typically oligotrophic members of freshwater lakes,  
369 notably represented by the genera *Planktophilia* (acI clade) and *Fonsibacter* (LD12 clade),  
370 respectively. These two groups alone can account for up to 50% of the bacterial community  
371 composition in lakes in the absence of high phytoplankton biomass (Salcher et al., 2011; Woodhouse  
372 et al., 2016). In addition, there is a high capacity for organic matter utilisation within Actinobacteriota

373 and Alphaproteobacteria, in particular by the genera *Planktoluna* (acIV clade) and *Sphingomonas*,  
374 respectively (Bagatini et al., 2014). An increased abundance of these latter bacterial taxa in the  
375 sampled urban landscapes reflects the enrichment of these copiotrophic taxa at the expense of other  
376 oligotrophic taxa. Moreover, the genus *Bifidobacterium* belonging to the phylum Actinobacteriota is a  
377 clear indicator of anthropogenic impacts (Bonjoch et al., 2004) and was only found in urban water.

378 Bacteroidota are well established members of freshwater systems (Newton et al., 2011). They perform  
379 important roles in the degradation of organic matter, in particular complex biopolymers (Kirchman,  
380 2002; Newton et al., 2011). Typically, in freshwater systems, dominance and diversity of Bacteroidota  
381 are driven by increasing concentrations of either autochthonous (mainly algal or zooplankton biomass)  
382 or allochthonous (mainly terrestrial detritus) particulate organic matter. A recent study demonstrates  
383 that Bacteroidota strains are highly specific to individual polymeric substrates (Krüger et al., 2019),  
384 suggesting that diversity of Bacteroidota scales with diversity of the organic matter pool which may be  
385 higher in urban than in rural lakes due to the multitude of different organic matter sources. The greater  
386 diversity of Bacteroidota in urban lakes supports this notion (Fig. A5). High terrestrial-aquatic  
387 coupling and the dynamic nature of urban landscapes implies a greater diversity of organic matter  
388 including faecal contamination (Buccheri et al., 2019; Dick et al., 2005; Krentz et al., 2013) in urban  
389 than in rural lakes where cyanobacterial derived autochthonous organic matter seems to be dominant.  
390 The genus *Bacteroides*, a known faecal contamination indicator (Hong et al., 2008; Kabiri et al.,  
391 2013), was a clear urban signature in our study. Members of Prevotellaceae, Rikenellaceae,  
392 Tannerellaceae and Weeksellaceae were also significantly enriched in urban waters. In rural lakes the  
393 bacterial families Chitinophagaceae, Flavobacteriaceae, Saprospiraceae and Spirosomaceae, well-  
394 known freshwater taxa and decomposers of complex carbon sources such as from phytoplankton  
395 (McIlroy, 2014; Newton et al., 2011; Raj and Maloy, 1990), were enriched. This suggests there is a  
396 multitude and complexity of possible organic matter sources for lakes in urbanized and rural areas.

397 Firmicutes are not usually abundant in lake water (Newton et al., 2011), but dominate in faeces and  
398 wastewater (Buccheri et al., 2019; Newton et al., 2015; Numberger et al., 2019a; Turnbaugh et al.,  
399 2007). In our samples, Firmicutes were highly abundant in wastewater, particularly the inflow samples

400 and showed a clear enrichment in urban lakes, but not in rural lakes. Enrichment in urban lakes can be  
401 explained by an increase of typical human-derived groups such as Enterococcaceae, Eubacteriaceae,  
402 Peptostreptococcaceae, Ruminococcaceae, Streptococcaceae and Veillonellaceae. This “human  
403 footprint” also includes genera with potential pathogenic species such as *Acinetobacter*, *Clostridium*,  
404 *Enterococcus*, *Escherichia/Shigella*, *Klebsiella*, *Rickettsia* and *Streptococcus*. Previously, toxigenic *C.*  
405 *difficile*, a well-known human pathogen, was isolated from a summer sample of the urban lake  
406 “Weisser See” (Numberger et al., 2019b). This supports the hypothesis that urbanization creates and  
407 supports favourable bacterial communities promoting the growth of potential pathogens and thus,  
408 increases the risk for waterborne or –transmitted bacterial infections.

409 Gammaproteobacteria generally occur at low abundance in natural freshwater lakes (Lindström and  
410 Leskinen, 2002; Newton et al., 2011; Zwart et al., 2002). The increased relative abundance of  
411 Gammaproteobacteria in urban and rural lakes was due to the abundance of members of  
412 Burkholderiaceae, Comamonadaceae and Methylophilaceae, all belonging to the order  
413 Burkholderiales. Although the relative abundance of Gammaproteobacteria as a whole did not increase  
414 in urban lakes, pronounced urban lake signatures were observed as represented by Aeromonadaceae,  
415 Enterobacteriaceae, Moraxellaceae, Pseudomonadaceae, Succinivibrionaceae and Xanthomonadaceae.  
416 These bacterial families, enriched in urban waters, include potential human pathogens such as  
417 *Aeromonas hydrophila* and *Pseudomonas aeruginosa* constituting a potential health risk. A positive  
418 correlation of Gammaproteobacteria with lake eutrophication has been previously observed (Kiersztyn  
419 et al., 2019) and relates to the fact that Gammaproteobacteria grow faster than the average lake  
420 bacterioplankton, particularly when nitrogen and phosphorus levels are high (Gasol et al., 2002; Šimek  
421 et al., 2006). Moreover, our CCA (**Fig. 2b**) showed a clear positive correlation of  
422 Gammaproteobacteria with orthophosphate, and to a lesser degree, nitrogen-based nutrients. Although  
423 we cannot clearly distinguish between urbanization and eutrophication as a driver for enrichment of  
424 Gammaproteobacteria, urbanization leads to an unavoidable eutrophication of aquatic ecosystems  
425 (Bowen and Valiela, 2001; Yu et al., 2012) and hence, creates highly favourable conditions for these  
426 potential pathogens. In particular, Aeromonadaceae and Pseudomonadaceae have been identified as  
427 potential reservoirs for antibiotics resistance genes in various aquatic environments. Thus, they



428 constitute a further potential threat to environmental and human health due to their ability to spread  
429 these genes to other harmful microorganisms (Bert et al., 1998; Figueira et al., 2011; Stalder et al.,  
430 2019).

431 Within lakes, bacterial communities were more stable over the four sampled time points in sediments  
432 than in surface water. Sediment samples revealed a higher bacterial diversity than the water column  
433 which has been shown previously (Feng et al., 2009). Sediment provides a more stable environment  
434 and can protect microbes, e.g. against environmental changes, UV radiation, drifting and grazing.  
435 Furthermore, sediment grains serve as a substrate for microbial biofilms, which further enhance  
436 microbial stability and persistence of specific taxa in the system (Haller et al., 2009; Walters et al.,  
437 2013). Some bacterial groups that include potential pathogens were also present in urban sediment  
438 samples and showed a significantly higher relative abundance than in water, e.g. *Clostridium*, *Bacillus*  
439 and *Pseudomonas* (Fig. A3). This is not surprising since sediments also provide sub-oxic or anoxic  
440 conditions which favour many human pathogens such as Enterobacteriaceae (Halda-Alija et al., 2001).  
441 Toxigenic *C. difficile* isolated from the sediment of the urban lake ‘Weißer See’ (Numberger et al.,  
442 2019b) and other studies demonstrate an extended persistence of faecal indicator bacteria such as  
443 *Enterococcus* associated with lake sediments, representing an often neglected reservoir function for  
444 human pathogens (Haller et al., 2009; Walters et al., 2013).

445 In our study, urban lakes contained a higher proportion of taxa which included potentially pathogenic  
446 organisms suggesting that urban waters contaminated with pathogenic bacteria enable these bacteria to  
447 find a favourable environment in which to proliferate (McLellan et al., 2015; Numberger et al., 2019b;  
448 Plano et al., 2011; Walters et al., 2011; Wiedenmann et al., 2006). The presence of bacterial sub-  
449 communities, which were mainly present in urban water and significantly enriched with some  
450 potential pathogenic groups, highlights this emerging health risk. Nevertheless, while the occurrence  
451 of “true” pathogenic species was rare (very low number of sequences) in this study, the enrichment of  
452 taxonomic groups to which they belong was constantly present in all urban samples. This increases the  
453 risk of stochastic and sudden outbreaks of pathogenic bacteria in urban settings which are less likely in  
454 rural settings where less favourable environmental conditions for such copiotrophic, pathogenic

455 bacteria prevail. This potential health risk of urban water bacterial communities may need to be  
456 accounted for in future urban lake management strategies (Hipsey and Brookes, 2013; Naselli-Flores,  
457 2008). This also holds true for coastal marine waters in the proximity of wastewater output, where the  
458 presence of potential pathogenic groups may increase health risk for waterborne or –transmitted  
459 diseases, in particular from urbanized areas (Buccheri et al., 2019).

## 460 **5. Conclusions**

461 Increased urbanization will accelerate “humanization” of aquatic bacterial communities. A better  
462 understanding of the ecological and functional consequences of urbanization and the roles of habitat  
463 specific bacterial groups is needed to mitigate potential health risks of urban bacterial communities.  
464 We identified specific taxa that can exploit ecological niches in urban water (i.e. human-derived  
465 bacterial groups such as *Alistipes*, *Bifidobacterium*, *Bacteroides*, *Enterococcus*, *Rickettsia*, and  
466 *Streptococcus*), and demonstrate that specific environmental conditions and the presence of specific  
467 sub-communities of bacteria promote the emergence and spread of taxa that are known to contain  
468 pathogenic species. Urbanization potentially favours aquatic microbiomes supporting the growth of  
469 pathogens and antibiotic-resistant bacteria that sporadically enter urban water systems. In contrast,  
470 natural waters due to differences in amount and quality of nutrients as well as organic matter and  
471 generally lower water temperatures form barriers which greatly limit this health risk. Consequently,  
472 urbanization and subsequent humanization should be taken as a serious emerging risk for spreading,  
473 propagation and transmission of human pathogens and antibiotic resistance. Beyond the increased  
474 proliferation of pathogenic and antibiotic-resistant microorganisms in urban waters, urbanization is  
475 likely to have additional impacts on aquatic biodiversity and biogeochemical cycling. Further research  
476 is required to explore these little studied and largely unknown impacts of urbanization on aquatic  
477 ecosystems. In the frame of the predicted increase in future urbanization, immediate action needs to be  
478 taken to mitigate the expected severe impact on aquatic ecosystems including disruptive effects for  
479 both humans and environment.

480

## 481 **ACKNOWLEDGEMENTS**

482 We sincerely thank Claudia Quedenau, Michael Sachtleben, Uta Mallock and Elke Mach for technical  
483 and Dr. Daniele Y. Sunaga-Franze for computational assistance. This work was supported by a project  
484 grant (IRG 3 - Water) from the Leibniz Research Alliance "INFECTIONS'21 - Transmission Control  
485 of Infections in the 21st Century" as funded by the Leibniz Association, Germany (SAS-2015-FZB-  
486 LFV) and the Leibniz SAW project "MycoLink" (SAW-2014-IGB). The German Federal Ministry of  
487 Education and Research (BMBF) supported this project within the Collaborative Project "Bridging in  
488 Biodiversity Science - BIBS" (funding number 01LC1501G).

489

#### 490 **COMPETING INTERESTS**

491 The authors confirm that they have no conflicts of interest related to the content of this article.

492

#### 493 **REFERENCES**

494 Ahlmann-Eltze, C., 2017. Ggsignif: Significance Brackets for "ggplot2." R Package Version  
495 40.

496 Al-Jassim, N., Ansari, M.I., Harb, M., Hong, P.-Y., 2015. Removal of bacterial contaminants  
497 and antibiotic resistance genes by conventional wastewater treatment processes in  
498 Saudi Arabia: Is the treated wastewater safe to reuse for agricultural irrigation? *Water*  
499 *Res.* 73, 277–290. <https://doi.org/10.1016/j.watres.2015.01.036>

500 Allgaier, M., Grossart, H.-P., 2006a. Diversity and seasonal dynamics of actinobacteria popu-  
501 lations in four lakes in northeastern Germany. *Appl. Environ. Microbiol.* 72, 3489–  
502 3497. <https://doi.org/10.1128/AEM.72.5.3489-3497.2006>

503 Allgaier, M., Grossart, H.-P., 2006b. Seasonal dynamics and phylogenetic diversity of free-  
504 living and particle-associated bacterial communities in four lakes in northeastern Ger-  
505 many. *Aquat. Microb. Ecol. - AQUAT MICROB ECOL* 45, 115–128.  
506 <https://doi.org/10.3354/ame045115>

507 Andersson, Y., De Jong, B., Studahl, A., 1997. Waterborne *Campylobacter* in Sweden: the  
508 cost of an outbreak. *Water Sci. Technol.* 35, 11.

509 Armson, D., Stringer, P., Ennos, A.R., 2012. The effect of tree shade and grass on surface and  
510 globe temperatures in an urban area. *Urban For. Urban Green.* 11, 245–255.  
511 <https://doi.org/10.1016/j.ufug.2012.05.002>

512 Asano, T., Levine, A.D., 1996. Wastewater reclamation, recycling and reuse: past, present,  
513 and future. *Water Sci. Technol., Wastewater Reclamation and Reuse* 33, 1–14.  
514 [https://doi.org/10.1016/0273-1223\(96\)00401-5](https://doi.org/10.1016/0273-1223(96)00401-5)

- 515 Aw, T.G., Rose, J.B., 2012. Detection of pathogens in water: from phylochips to qPCR to  
516 pyrosequencing. *Curr. Opin. Biotechnol., Energy biotechnology • Environmental bio-*  
517 *technology* 23, 422–430. <https://doi.org/10.1016/j.copbio.2011.11.016>
- 518 Babudieri, B., 1958. Animal Reservoirs of Leptospire. *Ann. N. Y. Acad. Sci.* 70, 393–413.  
519 <https://doi.org/10.1111/j.1749-6632.1958.tb35398.x>
- 520 Bagatini, I.L., Eiler, A., Bertilsson, S., Klaveness, D., Tessarolli, L.P., Vieira, A.A.H., 2014.  
521 Host-specificity and dynamics in bacterial communities associated with bloom-  
522 forming freshwater phytoplankton. *PLoS One* 9, e85950.  
523 <https://doi.org/10.1371/journal.pone.0085950>
- 524 Baker-Austin, C., Trinanes, J.A., Taylor, N.G.H., Hartnell, R., Siitonen, A., Martinez-Urtaza,  
525 J., 2013. Emerging *Vibrio* risk at high latitudes in response to ocean warming. *Nat.*  
526 *Clim. Change* 3, 73–77. <https://doi.org/10.1038/nclimate1628>
- 527 Behera, S.K., Kim, H.W., Oh, J.-E., Park, H.-S., 2011. Occurrence and removal of antibiotics,  
528 hormones and several other pharmaceuticals in wastewater treatment plants of the  
529 largest industrial city of Korea. *Sci. Total Environ.* 409, 4351–4360.  
530 <https://doi.org/10.1016/j.scitotenv.2011.07.015>
- 531 Bert, F., Maubec, E., Bruneau, B., Berry, P., Lambert-Zechovsky, N., 1998. Multi-resistant  
532 *Pseudomonas aeruginosa* outbreak associated with contaminated tap water in a neuro-  
533 surgery intensive care unit. *J. Hosp. Infect.* 39, 53–62. [https://doi.org/10.1016/S0195-](https://doi.org/10.1016/S0195-6701(98)90243-2)  
534 [6701\(98\)90243-2](https://doi.org/10.1016/S0195-6701(98)90243-2)
- 535 Bloem, J., Albert, C., Bär-Gillissen, M.-J.B., Berman, T., Cappenberg, T.E., 1989. Nutrient  
536 cycling through phytoplankton, bacteria and protozoa, in selectively filtered Lake  
537 Vechten water. *J. Plankton Res.* 11, 119–131. <https://doi.org/10.1093/plankt/11.1.119>
- 538 Bonjoch, X., Ballesté, E., Blanch, A.R., 2004. Multiplex PCR with 16S rRNA gene-targeted  
539 primers of *Bifidobacterium* spp. to identify sources of fecal pollution. *Appl. Environ.*  
540 *Microbiol.* 70, 3171–3175. <https://doi.org/10.1128/AEM.70.5.3171-3175.2004>
- 541 Bowen, J.L., Valiela, I., 2001. The ecological effects of urbanization of coastal watersheds:  
542 historical increases in nitrogen loads and eutrophication of Waquoit Bay estuaries.  
543 *Can. J. Fish. Aquat. Sci.* 58, 1489–1500. <https://doi.org/10.1139/f01-094>
- 544 Buccheri, M.A., Salvo, E., Coci, M., Quero, G.M., Zoccarato, L., Privitera, V., Rappazzo, G.,  
545 2019. Investigating microbial indicators of anthropogenic marine pollution by 16S and  
546 18S High-Throughput Sequencing (HTS) library analysis. *FEMS Microbiol. Lett.* 366.  
547 <https://doi.org/10.1093/femsle/fnz179>
- 548 Cáceres, M.D., Legendre, P., 2009. Associations between species and groups of sites: indices  
549 and statistical inference. *Ecology* 90, 3566–3574. <https://doi.org/10.1890/08-1823.1>
- 550 Cáceres, M.D., Legendre, P., Moretti, M., 2010. Improving indicator species analysis by  
551 combining groups of sites. *Oikos* 119, 1674–1684. [https://doi.org/10.1111/j.1600-](https://doi.org/10.1111/j.1600-0706.2010.18334.x)  
552 [0706.2010.18334.x](https://doi.org/10.1111/j.1600-0706.2010.18334.x)
- 553 Cai, L., Zhang, T., 2013. Detecting human bacterial pathogens in wastewater treatment plants  
554 by a high-throughput shotgun sequencing technique. *Environ. Sci. Technol.* 47, 5433–  
555 5441. <https://doi.org/10.1021/es400275r>

- 556 Callahan, B.J., McMurdie, P.J., Rosen, M.J., Han, A.W., Johnson, A.J.A., Holmes, S.P., 2016.  
557 DADA2: High-resolution sample inference from Illumina amplicon data. *Nat. Meth-*  
558 *ods* 13, 581–583. <https://doi.org/10.1038/nmeth.3869>
- 559 Charron, D.F., Thomas, M.K., Waltner-Toews, D., Aramini, J.J., Edge, T., Kent, R.A., Maa-  
560 rouf, A.R., Wilson, J., 2004. Vulnerability of waterborne diseases to climate change in  
561 Canada: a review. *J. Toxicol. Environ. Health A* 67, 1667–1677.  
562 <https://doi.org/10.1080/15287390490492313>
- 563 Clark, R.M., Geldreich, E.E., Fox, K.R., Rice, E.W., Johnson, C.H., Goodrich, J.A., Barnick,  
564 J.A., Abdesaken, F., Hill, J.E., Angulo, F.J., 1996. A waterborne *Salmonella typhi-*  
565 *murium* outbreak in Gideon, Missouri: Results from a field investigation. *Int. J. Envi-*  
566 *ron. Health Res.* 6, 187–193. <https://doi.org/10.1080/09603129609356889>
- 567 Conlan, S., Kong, H.H., Segre, J.A., 2012. Species-level analysis of DNA sequence data from  
568 the NIH Human Microbiome Project. *PloS One* 7, e47075.  
569 <https://doi.org/10.1371/journal.pone.0047075>
- 570 Dick, L.K., Bernhard, A.E., Brodeur, T.J., Domingo, J.W.S., Simpson, J.M., Walters, S.P.,  
571 Field, K.G., 2005. Host distributions of uncultivated fecal *Bacteroidales* bacteria re-  
572 veal genetic markers for fecal source identification. *Appl Env. Microbiol* 71, 3184–  
573 3191. <https://doi.org/10.1128/AEM.71.6.3184-3191.2005>
- 574 Dixon, P., 2003. VEGAN, a package of R functions for community ecology. *J. Veg. Sci.* 14,  
575 927–930. <https://doi.org/10.1111/j.1654-1103.2003.tb02228.x>
- 576 Elmir, S.M., Wright, M.E., Abdelzaher, A., Solo-Gabriele, H.M., Fleming, L.E., Miller, G.,  
577 Rybolowik, M., Peter Shih, M.-T., Pillai, S.P., Cooper, J.A., Quaye, E.A., 2007. Quan-  
578 titative evaluation of bacteria released by bathers in a marine water. *Water Res.* 41, 3–  
579 10. <https://doi.org/10.1016/j.watres.2006.10.005>
- 580 Feng, B.-W., Li, X.-R., Wang, J.-H., Hu, Z.-Y., Meng, H., Xiang, L.-Y., Quan, Z.-X., 2009.  
581 Bacterial diversity of water and sediment in the Changjiang estuary and coastal area of  
582 the East China Sea. *FEMS Microbiol. Ecol.* 70, 236–248.  
583 <https://doi.org/10.1111/j.1574-6941.2009.00772.x>
- 584 Figueira, V., Vaz-Moreira, I., Silva, M., Manaia, C.M., 2011. Diversity and antibiotic re-  
585 sistance of *Aeromonas* spp. in drinking and waste water treatment plants. *Water Res.*  
586 45, 5599–5611. <https://doi.org/10.1016/j.watres.2011.08.021>
- 587 Gardner, G.T., Prugh, T., Renner, M., Worldwatch Institute (Eds.), 2016. Can a city be sus-  
588 tainable? State of the world: an annual report on progress toward a sustainable society.  
589 Island Press, Washington.
- 590 Gasol, J.M., Comerma, M., García, J.C., Armengol, J., Casamayor, E.O., Kojecká, P., Šimek,  
591 K., 2002. A transplant experiment to identify the factors controlling bacterial abun-  
592 dance, activity, production, and community composition in a eutrophic canyon-shaped  
593 reservoir. *Limnol. Oceanogr.* 47, 62–77. <https://doi.org/10.4319/lo.2002.47.1.0062>
- 594 Gerba, C.P., 2000. Assessment of enteric pathogen shedding by bathers during recreational  
595 activity and its impact on water quality. *Quant. Microbiol.* 2, 55–68.  
596 <https://doi.org/10.1023/A:1010000230103>

- 597 Givens, C.E., Kolpin, D.W., Borchardt, M.A., Duris, J.W., Moorman, T.B., Spencer, S.K.,  
598 2016. Detection of hepatitis E virus and other livestock-related pathogens in Iowa  
599 streams. *Sci. Total Environ.* 566–567, 1042–1051.  
600 <https://doi.org/10.1016/j.scitotenv.2016.05.123>
- 601 Grimm, N.B., Faeth, S.H., Golubiewski, N.E., Redman, C.L., Wu, J., Bai, X., Briggs, J.M.,  
602 2008. Global Change and the Ecology of Cities. *Science* 319, 756–760.  
603 <https://doi.org/10.1126/science.1150195>
- 604 Güde, H., 1991. Participation of bacterioplankton in epilimnetic phosphorus cycles of Lake  
605 Constance. *SIL Proc.* 1922-2010 24, 816–820.  
606 <https://doi.org/10.1080/03680770.1989.11898857>
- 607 Halda-Alija, L., Hendricks, S.P., Johnston, T.C., 2001. Spatial and temporal variation of *En-*  
608 *terobacter* genotypes in sediments and the underlying hyporheic zone of an agricultur-  
609 al stream. *Microb. Ecol.* 42, 286–294. <https://doi.org/10.1007/s00248-001-0021-0>
- 610 Hall, R.I., Leavitt, P.R., Quinlan, R., Dixit, A.S., Smol, J.P., 1999. Effects of agriculture, ur-  
611 banization, and climate on water quality in the northern Great Plains. *Limnol. Ocean-*  
612 *ogr.* 44, 739–756. [https://doi.org/10.4319/lo.1999.44.3\\_part\\_2.0739](https://doi.org/10.4319/lo.1999.44.3_part_2.0739)
- 613 Haller, L., Amedegnato, E., Poté, J., Wildi, W., 2009. Influence of freshwater sediment char-  
614 aracteristics on persistence of fecal indicator bacteria. *Water. Air. Soil Pollut.* 203, 217–  
615 227. <https://doi.org/10.1007/s11270-009-0005-0>
- 616 Hamilton, N.E., Ferry, M., 2018. Ggtern: Ternary Diagrams Using ggplot2. *J. Stat. Softw.* 87,  
617 1–17. <https://doi.org/10.18637/jss.v087.c03>
- 618 Hipsey, M.R., Brookes, J.D., 2013. Pathogen management in surface waters: practical consid-  
619 erations for reducing public health risk. *Curr. Top. Public Health.*  
620 <https://doi.org/10.5772/55367>
- 621 Hong, P.-Y., Wu, J.-H., Liu, W.-T., 2008. Relative abundance of *Bacteroides* spp. in stools  
622 and wastewaters as determined by hierarchical oligonucleotide primer extension.  
623 *Appl. Environ. Microbiol.* 74, 2882–2893. <https://doi.org/10.1128/AEM.02568-07>
- 624 Hunter, P.R., 2003. Climate change and waterborne and vector-borne disease. *J. Appl. Micro-*  
625 *biol.* 94, 37–46.
- 626 Ibekwe, A.M., Ma, J., Murinda, S.E., 2016. Bacterial community composition and structure in  
627 an urban river impacted by different pollutant sources. *Sci. Total Environ.* 566–567,  
628 1176–1185. <https://doi.org/10.1016/j.scitotenv.2016.05.168>
- 629 Kabiri, L., Alum, A., Rock, C., McLain, J.E., Abbaszadegan, M., 2013. Isolation of *Bac-*  
630 *teroides* from fish and human fecal samples for identification of unique molecular  
631 markers. *Can. J. Microbiol.* 59, 771–777. <https://doi.org/10.1139/cjm-2013-0518>
- 632 Kiersztyn, B., Chróst, R., Kaliński, T., Siuda, W., Bukowska, A., Kowalczyk, G., Grabowska,  
633 K., 2019. Structural and functional microbial diversity along a eutrophication gradient  
634 of interconnected lakes undergoing anthropopressure. *Sci. Rep.* 9, 1–14.  
635 <https://doi.org/10.1038/s41598-019-47577-8>

- 636 Kirchman, D.L., 2002. The ecology of *Cytophaga-Flavobacteria* in aquatic environments.  
637 FEMS Microbiol. Ecol. 39, 91–100. <https://doi.org/10.1111/j.1574->  
638 6941.2002.tb00910.x
- 639 Kirstein, I.V., Kirmizi, S., Wichels, A., Garin-Fernandez, A., Erler, R., Löder, M., Gerdts, G.,  
640 2016. Dangerous hitchhikers? Evidence for potentially pathogenic *Vibrio* spp. on mi-  
641 croplastic particles. Mar. Environ. Res. 120, 1–8.  
642 <https://doi.org/10.1016/j.marenvres.2016.07.004>
- 643 Krentz, C.A., Prystajeky, N., Isaac-Renton, J., 2013. Identification of fecal contamination  
644 sources in water using host-associated markers. Can. J. Microbiol. 59, 210–220.  
645 <https://doi.org/10.1139/cjm-2012-0618>
- 646 Krienitz, L., Kasprzak, P., Koschel, R., 1996. Long term study on the influence of eutrophica-  
647 tion, restoration and biomanipulation on the structure and development of phytoplank-  
648 ton communities in Feldberger Haussee (Baltic Lake District, Germany). Hydrobiolo-  
649 gia 330, 89–110. <https://doi.org/10.1007/BF00019998>
- 650 Krüger, K., Chafee, M., Ben Francis, T., Glavina del Rio, T., Becher, D., Schweder, T.,  
651 Amann, R.I., Teeling, H., 2019. In marine *Bacteroidetes* the bulk of glycan degrada-  
652 tion during algae blooms is mediated by few clades using a restricted set of genes.  
653 ISME J. 13, 2800–2816. <https://doi.org/10.1038/s41396-019-0476-y>
- 654 Kupek, E., De, M.S.S.F., De, J.S.P., 2000. The relationship between rainfall and human leptos-  
655 pirosis in Florianópolis, Brazil, 1991-1996. Braz. J. Infect. Dis. Off. Publ. Braz. Soc.  
656 Infect. Dis. 4, 131–134.
- 657 Langfelder, P., Horvath, S., 2008. WGCNA: an R package for weighted correlation network  
658 analysis. BMC Bioinformatics 9, 559. <https://doi.org/10.1186/1471-2105-9-559>
- 659 Lapointe, B.E., Herren, L.W., Debortoli, D.D., Vogel, M.A., 2015. Evidence of sewage-  
660 driven eutrophication and harmful algal blooms in Florida’s Indian River Lagoon.  
661 Harmful Algae 43, 82–102. <https://doi.org/10.1016/j.hal.2015.01.004>
- 662 Lewis, D.A., Brown, R., Williams, J., White, P., Jacobson, S.K., Marchesi, J., Drake, M.J.,  
663 2013. The human urinary microbiome; bacterial DNA in voided urine of asymptomat-  
664 ic adults. Front. Cell. Infect. Microbiol. 3. <https://doi.org/10.3389/fcimb.2013.00041>
- 665 Lindström, E.S., Leskinen, E., 2002. Do neighboring lakes share common taxa of bacterio-  
666 plankton? Comparison of 16S rDNA fingerprints and sequences from three geographic  
667 regions. Microb. Ecol. 44, 1–9. <https://doi.org/10.1007/s00248-002-0007-6>
- 668 Markwell, D.D., Shortridge, K.F., 1982. Possible waterborne transmission and maintenance of  
669 influenza viruses in domestic ducks. Appl. Environ. Microbiol. 43, 110–115.
- 670 Martin, M., 2011. Cutadapt removes adapter sequences from high-throughput sequencing  
671 reads. EMBnet.journal 17, 10–12. <https://doi.org/10.14806/ej.17.1.200>
- 672 McIlroy, S.J., 2014. The Family *Saprospiraceae*. Prokaryotes 863–889.  
673 [https://doi.org/10.1007/978-3-642-38954-2\\_138](https://doi.org/10.1007/978-3-642-38954-2_138)

- 674 McLellan, S.L., Fisher, J.C., Newton, R.J., 2015. The microbiome of urban waters. *Int. Mi-*  
675 *crobiol. Off. J. Span. Soc. Microbiol.* 18, 141–149.  
676 <https://doi.org/10.2436/20.1501.01.244>
- 677 Mosher, J.J., Bowman, B., Bernberg, E.L., Shevchenko, O., Kan, J., Korlach, J., Kaplan, L.A.,  
678 2014. Improved performance of the PacBio SMRT technology for 16S rDNA sequenc-  
679 ing. *J. Microbiol. Methods* 104, 59–60. <https://doi.org/10.1016/j.mimet.2014.06.012>
- 680 Naselli-Flores, L., 2008. Urban lakes: ecosystems at risk, worthy of the best care, in: *Proceed-*  
681 *ings of Taal2007: The 12th World Lake Conference.* p. 1337.
- 682 Newton, R.J., Jones, S.E., Eiler, A., McMahon, K.D., Bertilsson, S., 2011. A guide to the nat-  
683 ural history of freshwater lake bacteria. *Microbiol. Mol. Biol. Rev.* 75, 14–49.  
684 <https://doi.org/10.1128/MMBR.00028-10>
- 685 Newton, R.J., McLellan, S.L., Dila, D.K., Vineis, J.H., Morrison, H.G., Eren, A.M., Sogin,  
686 M.L., 2015. Sewage reflects the microbiomes of human populations. *mBio* 6, e02574-  
687 14. <https://doi.org/10.1128/mBio.02574-14>
- 688 Numberger, D., Ganzert, L., Zoccarato, L., Mühldorfer, K., Sauer, S., Grossart, H.-P., Green-  
689 wood, A.D., 2019a. Characterization of bacterial communities in wastewater with en-  
690 hanced taxonomic resolution by full-length 16S rRNA sequencing. *Sci. Rep.* 9, 9673.  
691 <https://doi.org/10.1038/s41598-019-46015-z>
- 692 Numberger, D., Riedel, T., McEwen, G., Nübel, U., Frentrup, M., Schober, I., Bunk, B.,  
693 Spröer, C., Overmann, J., Grossart, H.-P., Greenwood, A.D., 2019b. Genomic analysis  
694 of three *Clostridioides difficile* isolates from urban water sources. *Anaerobe.*  
695 <https://doi.org/10.1016/j.anaerobe.2019.01.002>
- 696 Oksanen, J., Blanchet, F.G., Kindt, R., Legendre, P., Minchin, P.R., O'hara, R.B., Simpson,  
697 G.L., Solymos, P., Stevens, M.H.H., Wagner, H., 2014. Package 'vegan.' *Community*  
698 *Ecol. Package R Package Version 2.*
- 699 Pal, A., Gin, K.Y.-H., Lin, A.Y.-C., Reinhard, M., 2010. Impacts of emerging organic con-  
700 taminants on freshwater resources: Review of recent occurrences, sources, fate and ef-  
701 fects. *Sci. Total Environ.* 408, 6062–6069.  
702 <https://doi.org/10.1016/j.scitotenv.2010.09.026>
- 703 Parent, S.-É., Parent, L.E., 2015. Biochemical fractionation of soil organic matter after incor-  
704 poration of organic residues. *Open J. Soil Sci.* 5, 135–143.  
705 <https://doi.org/10.4236/ojss.2015.56013>
- 706 Plano, L.R., Garza, A.C., Shibata, T., Elmir, S.M., Kish, J., Sinigalliano, C.D., Gidley, M.L.,  
707 Miller, G., Withum, K., Fleming, L.E., Solo-Gabriele, H.M., 2011. Shedding of *Staph-*  
708 *ylococcus aureus* and methicillin-resistant *Staphylococcus aureus* from adult and pe-  
709 diatric bathers in marine waters. *BMC Microbiol.* 11, 5. [https://doi.org/10.1186/1471-](https://doi.org/10.1186/1471-2180-11-5)  
710 [2180-11-5](https://doi.org/10.1186/1471-2180-11-5)
- 711 Pruesse, E., Peplies, J., Glöckner, F.O., 2012. SINA: Accurate high-throughput multiple se-  
712 quence alignment of ribosomal RNA genes. *Bioinformatics* 28, 1823–1829.  
713 <https://doi.org/10.1093/bioinformatics/bts252>



- 714 Quast, C., Pruesse, E., Yilmaz, P., Gerken, J., Schweer, T., Yarza, P., Peplies, J., Glöckner,  
715 F.O., 2013. The SILVA ribosomal RNA gene database project: improved data pro-  
716 cessing and web-based tools. *Nucleic Acids Res.* 41, D590–D596.  
717 <https://doi.org/10.1093/nar/gks1219>
- 718 R Core Team, 2013. R: A language and environment for statistical computing.
- 719 Raj, H.D., Maloy, S.R., 1990. Family *Spirosomaceae*: gram-negative ring-forming aerobic  
720 bacteria. *Crit. Rev. Microbiol.* 17, 329–364.  
721 <https://doi.org/10.3109/10408419009114761>
- 722 Rizzo, L., Manaia, C., Merlin, C., Schwartz, T., Dagot, C., Ploy, M.C., Michael, I., Fatta-  
723 Kassinos, D., 2013. Urban wastewater treatment plants as hotspots for antibiotic re-  
724 sistant bacteria and genes spread into the environment: A review. *Sci. Total Environ.*  
725 447, 345–360. <https://doi.org/10.1016/j.scitotenv.2013.01.032>
- 726 Rojas, P., Monahan, A.M., Schuller, S., Miller, I.S., Markey, B.K., Nally, J.E., 2010. Detec-  
727 tion and quantification of leptospires in urine of dogs: a maintenance host for the zo-  
728 onotic disease leptospirosis. *Eur. J. Clin. Microbiol. Infect. Dis.* 29, 1305–1309.  
729 <https://doi.org/10.1007/s10096-010-0991-2>
- 730 Salcher, M.M., Pernthaler, J., Posch, T., 2011. Seasonal bloom dynamics and ecophysiology  
731 of the freshwater sister clade of SAR11 bacteria ‘that rule the waves’ (LD12). *ISME J.*  
732 5, 1242–1252. <https://doi.org/10.1038/ismej.2011.8>
- 733 Schillinger, J.E., Gannon, J.J., 1985. Bacterial adsorption and suspended particles in urban  
734 stormwater. *J. Water Pollut. Control Fed.* 57, 384–389.
- 735 Seto, K.C., Fragkias, M., Güneralp, B., Reilly, M.K., 2011. A meta-analysis of global urban  
736 land expansion. *PLoS ONE* 6. <https://doi.org/10.1371/journal.pone.0023777>
- 737 Šimek, K., Horňák, K., Jezbera, J., Nedoma, J., Vrba, J., Straškrábová, V., Macek, M., Dolan,  
738 J.R., Hahn, M.W., 2006. Maximum growth rates and possible life strategies of differ-  
739 ent bacterioplankton groups in relation to phosphorus availability in a freshwater res-  
740 ervoir. *Environ. Microbiol.* 8, 1613–1624. <https://doi.org/10.1111/j.1462-2920.2006.01053.x>
- 742 Smith, V.H., Schindler, D.W., 2009. Eutrophication science: where do we go from here?  
743 *Trends Ecol. Evol.* 24, 201–207. <https://doi.org/10.1016/j.tree.2008.11.009>
- 744 Stalder, T., Press, M.O., Sullivan, S., Liachko, I., Top, E.M., 2019. Linking the resistome and  
745 plasmidome to the microbiome. *ISME J.* 13, 2437–2446.  
746 <https://doi.org/10.1038/s41396-019-0446-4>
- 747 Steyer, A., Gutiérrez-Aguirre, I., Rački, N., Beigot Glaser, S., Brajer Humar, B., Stražar, M.,  
748 Škrjanc, I., Poljšak-Prijatelj, M., Ravnikar, M., Rupnik, M., 2015. The detection rate  
749 of enteric viruses and *Clostridium difficile* in a waste water treatment plant effluent.  
750 *Food Environ. Virol.* 7, 164–172. <https://doi.org/10.1007/s12560-015-9183-7>
- 751 Sundborg, Å., 1950. Local climatological studies of the temperature conditions in an urban  
752 area. *Tellus* 2, 222–232. <https://doi.org/10.3402/tellusa.v2i3.8544>

- 753 Tahrani, L., Van Loco, J., Ben Mansour, H., Reyns, T., 2015. Occurrence of antibiotics in  
754 pharmaceutical industrial wastewater, wastewater treatment plant and sea waters in  
755 Tunisia. *J. Water Health* 14, 208–213. <https://doi.org/10.2166/wh.2015.224>
- 756 Tan, J., Zheng, Y., Tang, X., Guo, C., Li, L., Song, G., Zhen, X., Yuan, D., Kalkstein, A.J.,  
757 Li, F., Chen, H., 2010. The urban heat island and its impact on heat waves and human  
758 health in Shanghai. *Int. J. Biometeorol.* 54, 75–84. [https://doi.org/10.1007/s00484-](https://doi.org/10.1007/s00484-009-0256-x)  
759 009-0256-x
- 760 Taylor, S.L., Roberts, S.C., Walsh, C.J., Hatt, B.E., 2004. Catchment urbanisation and in-  
761 creased benthic algal biomass in streams: linking mechanisms to management.  
762 *Freshw. Biol.* 49, 835–851. <https://doi.org/10.1111/j.1365-2427.2004.01225.x>
- 763 Turnbaugh, P.J., Ley, R.E., Hamady, M., Fraser-Liggett, C.M., Knight, R., Gordon, J.I., 2007.  
764 The human microbiome project. *Nature* 449, 804–810.  
765 <https://doi.org/10.1038/nature06244>
- 766 Viršek, M.K., Lovšin, M.N., Koren, Š., Kržan, A., Peterlin, M., 2017. Microplastics as a vec-  
767 tor for the transport of the bacterial fish pathogen species *Aeromonas salmonicida*.  
768 *Mar. Pollut. Bull.* 125, 301–309. <https://doi.org/10.1016/j.marpolbul.2017.08.024>
- 769 Vörösmarty, C.J., Green, P., Salisbury, J., Lammers, R.B., 2000. Global water resources: vul-  
770 nerability from climate change and population growth. *Science* 289, 284–288.  
771 <https://doi.org/10.1126/science.289.5477.284>
- 772 Wakelin, S.A., Colloff, M.J., Kookana, R.S., 2008. Effect of wastewater treatment plant efflu-  
773 ent on microbial function and community structure in the sediment of a freshwater  
774 stream with variable seasonal flow. *Appl. Environ. Microbiol.* 74, 2659–2668.  
775 <https://doi.org/10.1128/AEM.02348-07>
- 776 Walters, E., Graml, M., Behle, C., Müller, E., Horn, H., 2013. Influence of particle associa-  
777 tion and suspended solids on uv inactivation of fecal indicator bacteria in an urban riv-  
778 er. *Water. Air. Soil Pollut.* 225, 1822. <https://doi.org/10.1007/s11270-013-1822-8>
- 779 Walters, S.P., Thebo, A.L., Boehm, A.B., 2011. Impact of urbanization and agriculture on the  
780 occurrence of bacterial pathogens and *stx* genes in coastal waterbodies of central Cali-  
781 fornia. *Water Res.* 45, 1752–1762. <https://doi.org/10.1016/j.watres.2010.11.032>
- 782 Wang, H., Edwards, M.A., Falkinham, J.O., Pruden, A., 2013. Probiotic approach to pathogen  
783 control in premise plumbing systems? A review. *Environ. Sci. Technol.* 47, 10117–  
784 10128. <https://doi.org/10.1021/es402455r>
- 785 Wang, J., Jia, H., 2016. Metagenome-wide association studies: fine-mining the microbiome.  
786 *Nat. Rev. Microbiol.* 14, 508–522. <https://doi.org/10.1038/nrmicro.2016.83>
- 787 Ward, M.P., 2002. Seasonality of canine leptospirosis in the United States and Canada and its  
788 association with rainfall. *Prev. Vet. Med.* 56, 203–213. [https://doi.org/10.1016/S0167-](https://doi.org/10.1016/S0167-5877(02)00183-6)  
789 5877(02)00183-6
- 790 Wetzel, R.G., Likens, G.E., 1991. Inorganic nutrients: nitrogen, phosphorus, and other nutri-  
791 ents, in: *Limnological Analyses*. Springer, pp. 81–105.
- 792 Wickham, H., 2009. Elegant graphics for data analysis (ggplot2). *Appl Spat. Data Anal R.*

- 793 Wiedenmann, A., Krüger, P., Dietz, K., López-Pila, J.M., Szewzyk, R., Botzenhart, K., 2006.  
794 A randomized controlled trial assessing infectious disease risks from bathing in fresh  
795 recreational waters in relation to the concentration of *Escherichia coli*, intestinal en-  
796 terococci, *Clostridium perfringens*, and somatic coliphages. Environ. Health Perspect.  
797 114, 228–236. <https://doi.org/10.1289/ehp.8115>
- 798 Woodhouse, J.N., Kinsela, A.S., Collins, R.N., Bowling, L.C., Honeyman, G.L., Holliday,  
799 J.K., Neilan, B.A., 2016. Microbial communities reflect temporal changes in cyano-  
800 bacterial composition in a shallow ephemeral freshwater lake. ISME J. 10, 1337–1351.  
801 <https://doi.org/10.1038/ismej.2015.218>
- 802 Wu, R.S.S., 1999. Eutrophication, water borne pathogens and xenobiotic compounds: envi-  
803 ronmental risks and challenges. Mar. Pollut. Bull. 39, 11–22.  
804 [https://doi.org/10.1016/S0025-326X\(99\)00014-4](https://doi.org/10.1016/S0025-326X(99)00014-4)
- 805 Yarza, P., Yilmaz, P., Pruesse, E., Glöckner, F.O., Ludwig, W., Schleifer, K.-H., Whitman,  
806 W.B., Euzéby, J., Amann, R., Rosselló-Móra, R., 2014. Uniting the classification of  
807 cultured and uncultured bacteria and archaea using 16S rRNA gene sequences. Nat.  
808 Rev. Microbiol. 12, 635–645. <https://doi.org/10.1038/nrmicro3330>
- 809 Yu, S., Yu, G.B., Liu, Y., Li, G.L., Feng, S., Wu, S.C., Wong, M.H., 2012. Urbanization im-  
810 pairs surface water quality: eutrophication and metal stress in the Grand Canal of Chi-  
811 na. River Res. Appl. 28, 1135–1148. <https://doi.org/10.1002/rra.1501>
- 812 Zinia, N.J., Kroeze, C., 2015. Future trends in urbanization and coastal water pollution in the  
813 Bay of Bengal: the lived experience. Environ. Dev. Sustain. 17, 531–546.  
814 <https://doi.org/10.1007/s10668-014-9558-1>
- 815 Zwart, G., Crump, B.C., Agterveld, M.P.K., Hagen, F., Han, S.-K., 2002. Typical freshwater  
816 bacteria: an analysis of available 16S rRNA gene sequences from plankton of lakes  
817 and rivers. Aquat. Microb. Ecol. 28, 141–155. <https://doi.org/10.3354/ame028141>

818

## 819 **FIGURE LEGENDS**

### 820 **Figure 1: Influence of environmental parameters on the bacterial communities in surface water.**

821 **[a]** A constrained correspondence analysis (CCA) of all water samples and their corresponding  
822 environmental measurements: ammonium, dissolved organic carbon (DOC), nitrite, nitrate,  
823 orthophosphate (OP), pH, and temperature is shown. Colours indicate the season (blue: winter, green:  
824 spring, pink: summer and brown: autumn) and the symbols show the different lakes (square:  
825 Stechlinsee, diamond: Dagowsee, circle: Feldberger Haussee, triangle: Müggelsee and inverse  
826 triangle: Weißer See). **[b]** A constrained correspondence analysis (CCA) shows the most abundant  
827 bacterial phyla Actinobacteriota (Actino), Alphaproteobacteria (Alpha), Bacteroidota (Bact),

828 Cyanobacteria (Cyano), Firmicutes (Firm), Gammaproteobacteria (Gamma), Planctomycetota  
829 (Plancto) and Verrucomicrobiota (Verruco) and their correlations with the environmental  
830 measurements in lake surface water samples.

831 **Figure 2: Differences in relative abundance of dominant bacterial phyla between wastewater,**  
832 **urban and rural lakes (summing all seasons and sites).** Boxplots show the relative abundance of the  
833 most abundant bacterial phyla for wastewater inflow (IN), wastewater outflow (OUT), urban lakes (U:  
834 Weisser See, Müggelsee, Feldberger Haussee), and rural lakes (R: Dagowsee, Stechlinsee). Significant  
835 differences are indicated by asterisks based on Wilcoxon test. Gammaproteobacteria do not include  
836 members of the order Burkholderiales, which have been analysed separately. Rel. abundance – relative  
837 abundance, NS – not significant.

838 **Figure 3: Core, shared and unique ASVs of urban lakes, rural lakes and wastewater.** A Venn  
839 diagram shows core, shared and unique ASVs of the wastewater treatment plant (WWTP inflow and  
840 outflow), urban (Weisser See, Müggelsee, Feldberger Haussee) and rural lakes (Dagowsee,  
841 Stechlinsee), including sediment samples.

842 **Figure 4: Habitat specific bacterial communities.** [a] Ternary plots show the number and relative  
843 abundance of ASVs (dots) that had 10 or more sequences in at least 3 samples and their occurrence in  
844 rural freshwater, urban freshwater and wastewater. Only the most abundant bacterial phyla/groups are  
845 shown. Colours in the plots indicate the number of ASVs (log-transformed) and the size of the dots  
846 indicate the maximum relative abundance for each ASV. Points close to the corners of the plots  
847 represent either ASVs that occur more often or that are specific for that given habitat, while points  
848 between two vertexes or in the middle of the plots have similar occurrence or are specific for the  
849 combination of the related habitat. Max. RA – maximum relative abundance.

850 **Figure 5: The prevalence of genera that are known to contain potential human pathogens [a]**  
851 **and their correlation with specific sub-communities (1-23) [b].** Heatmap [a] shows the average  
852 relative abundance in the wastewater treatment plant (WWTP), lake water, and lake sediment.  
853 Heatmap [b] shows the results of a weighted correlation network analyses (WGCNA). Only  
854 significant correlations ( $p < 0.05$ ) of the potential pathogenic genera and specific sub-community

855 structures are shown. The composition and detailed occurrence of the sub-community ASVs can be  
856 found in **Suppl. Figure S2**. Alphaproteo – Alphaproteobacteria, Gammaproteo. –  
857 Gammaproteobacteria.

858 **Figure 6: Correlation of potential pathogenic genera and environmental measurements of the**  
859 **water samples.** A constrained correspondence analysis (CCA) of genera that are known to contain  
860 potential human pathogens from all water samples and the measured environmental measurements:  
861 ammonium, dissolved organic carbon (DOC), nitrite, nitrate, orthophosphate (OP), pH, and  
862 temperature (Temp.) is shown. *Ac. Acinetobacter*, *Ae. Aeromonas*, *Al. Alistipes*, *Cl. Clostridium*  
863 (*sensu-stricto*), *En. Enterococcus*, *ES Escherichia/ Shigella*, *Kl. Klebsiella*, *Leg. Legionella*, *Lep.*  
864 *Leptospira*, *Mi. Microcystis*, *Mb. Mycobacterium*, *Pe. Peptoclostridium*, *Ps Pseudomonas*, *St.*  
865 *Streptococcus* and *Vi. Vibrio*.

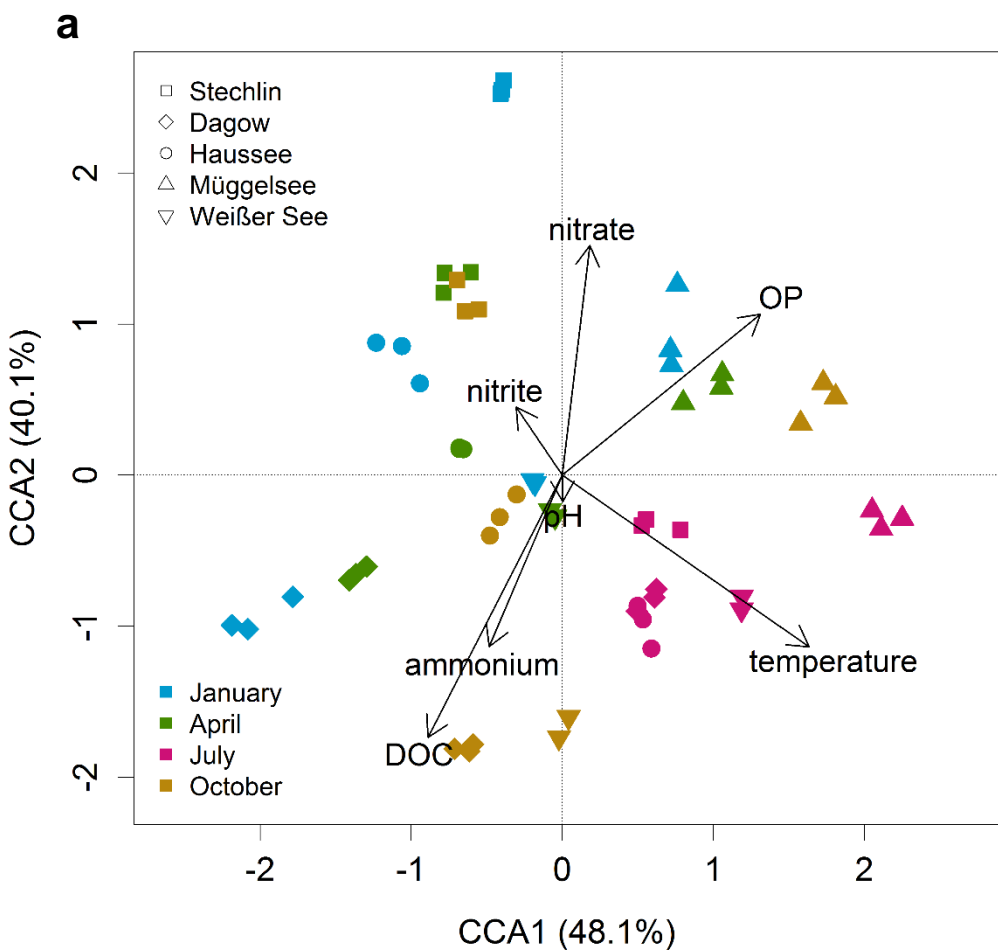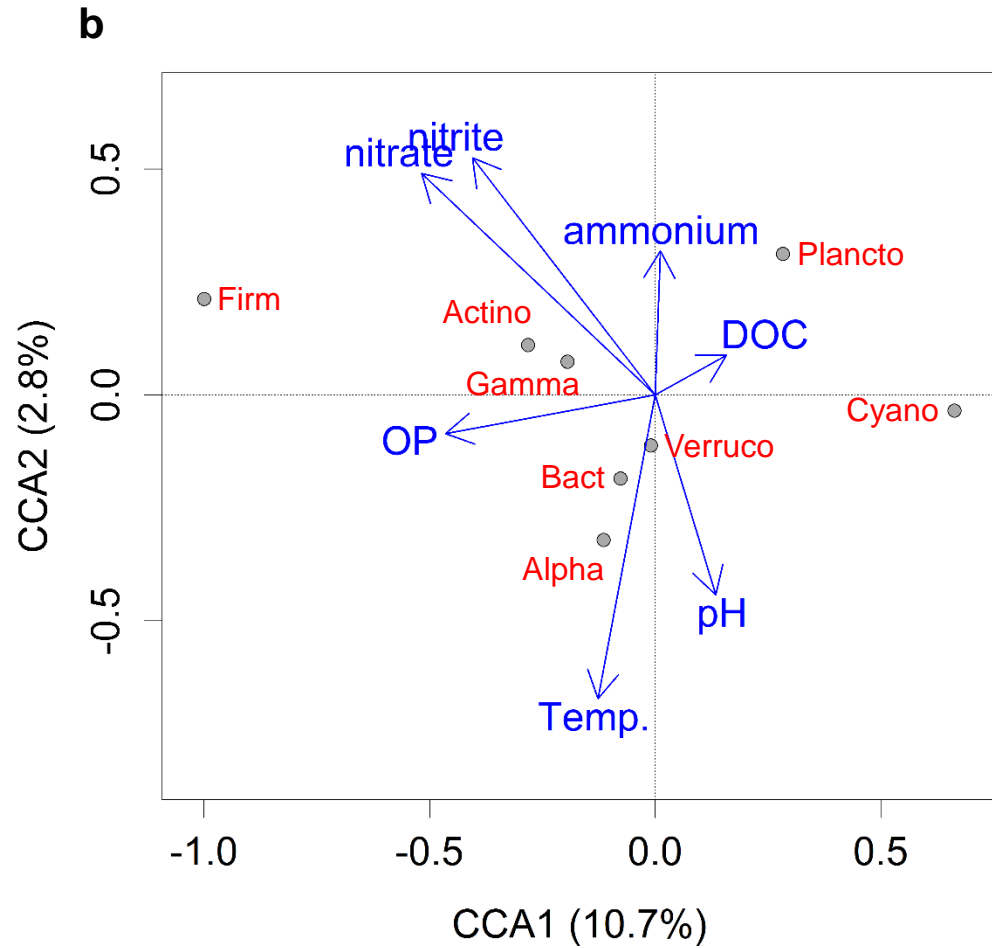

### Actinobacteriota

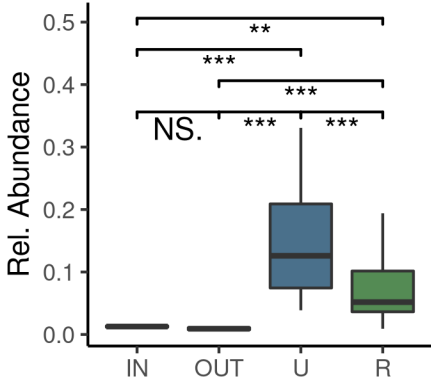

### Alphaproteobacteria

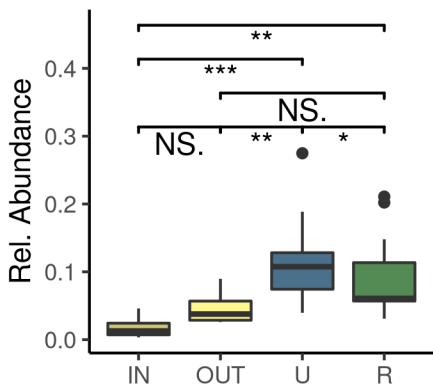

### Bacteroidota

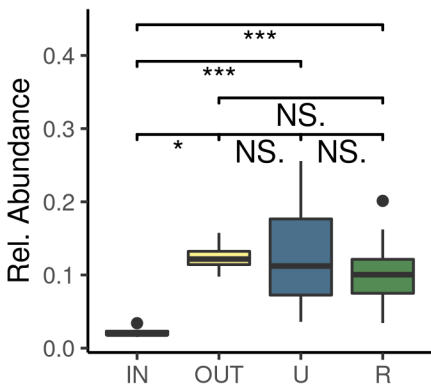

### Burkholderiales

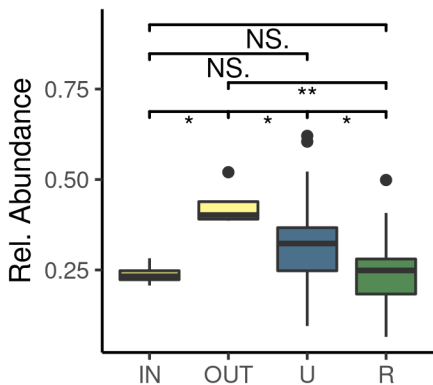

### Firmicutes

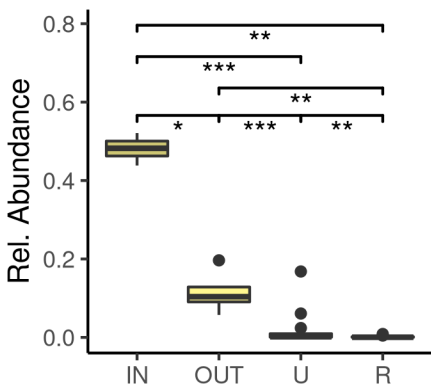

### Gammaproteobacteria

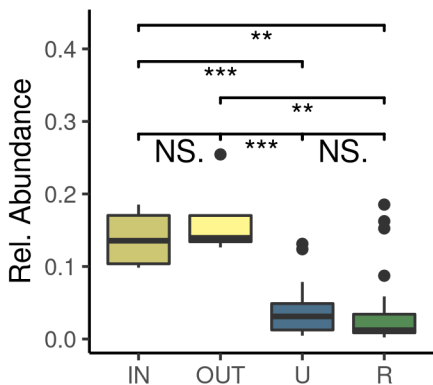

### Planctomycetota

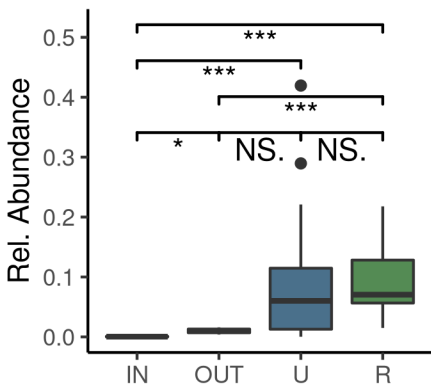

### Verrucomicrobiota

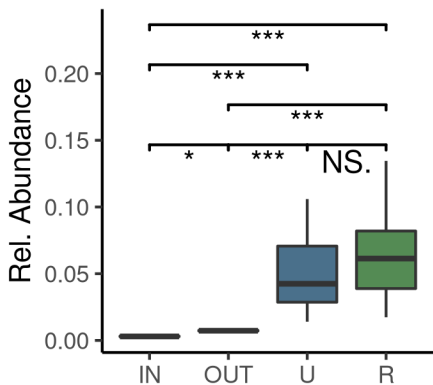

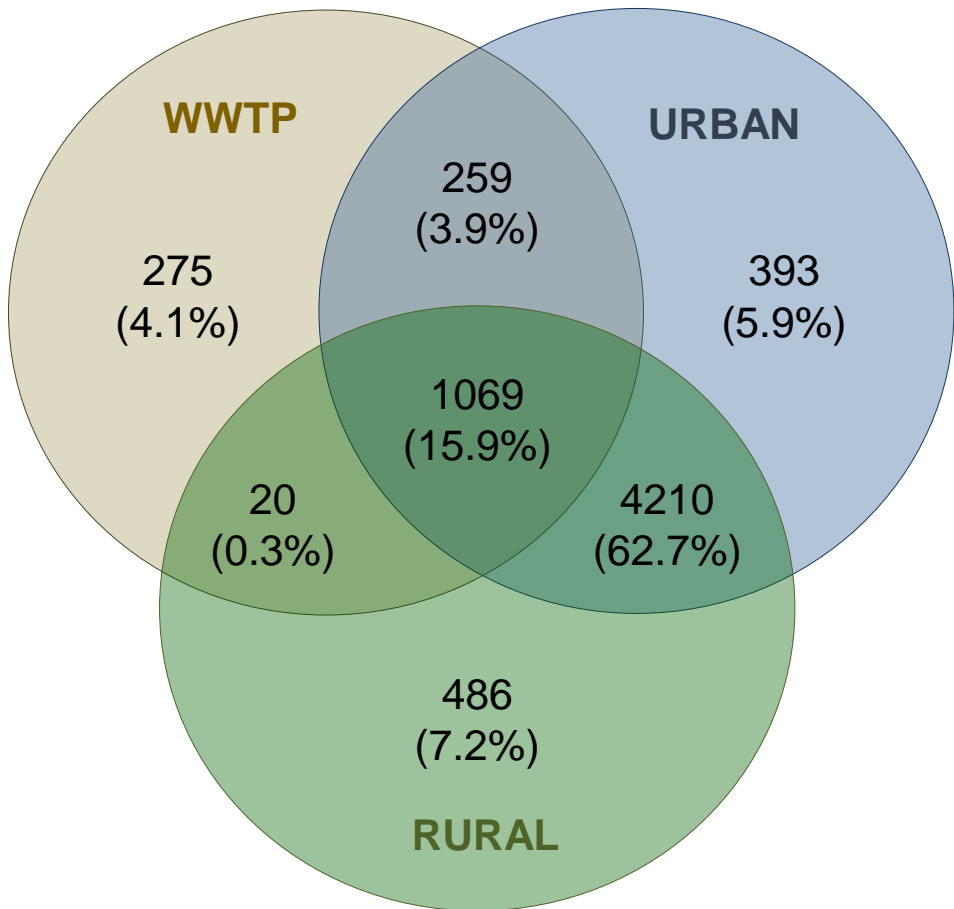



## Actinobacteriota

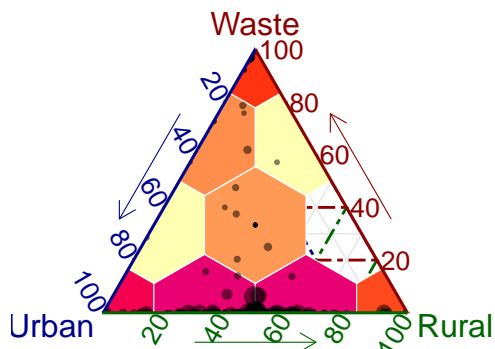

## Alphaproteobacteria

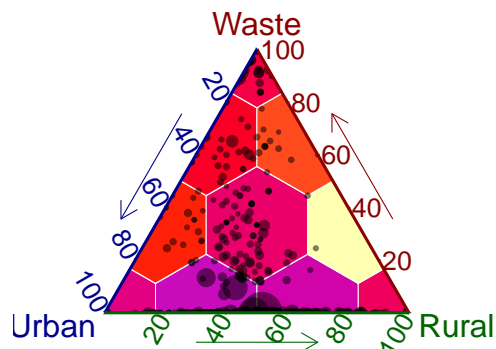

## Bacteroidota

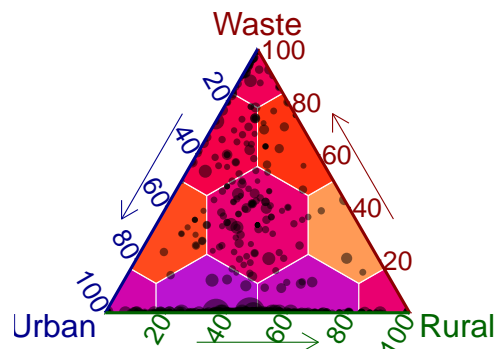

## Burkholderiales

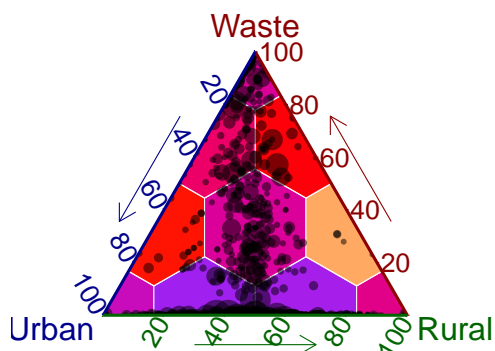

## Firmicutes

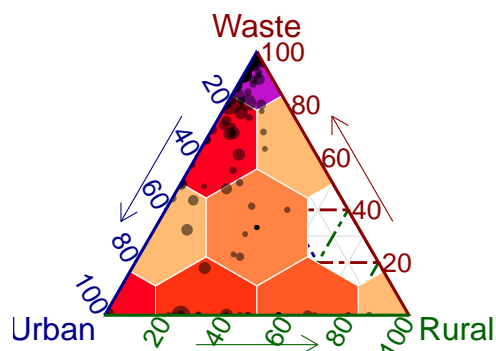

## Gammaproteobacteria

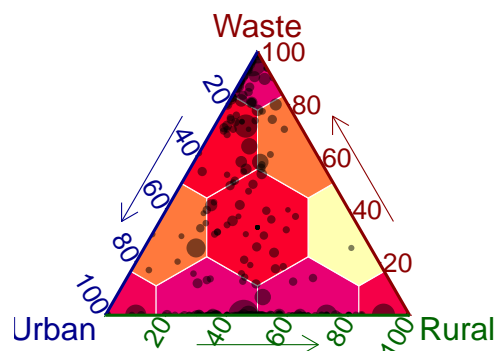log( $N_{ASVs}$ )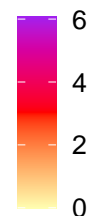

Max. RA

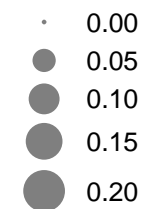

## Planctomycetota

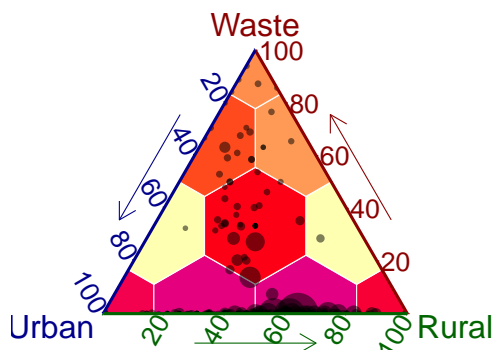

## Verrucomicrobiota

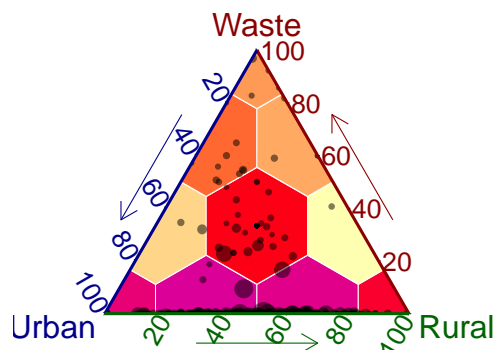

a. Relative abundance

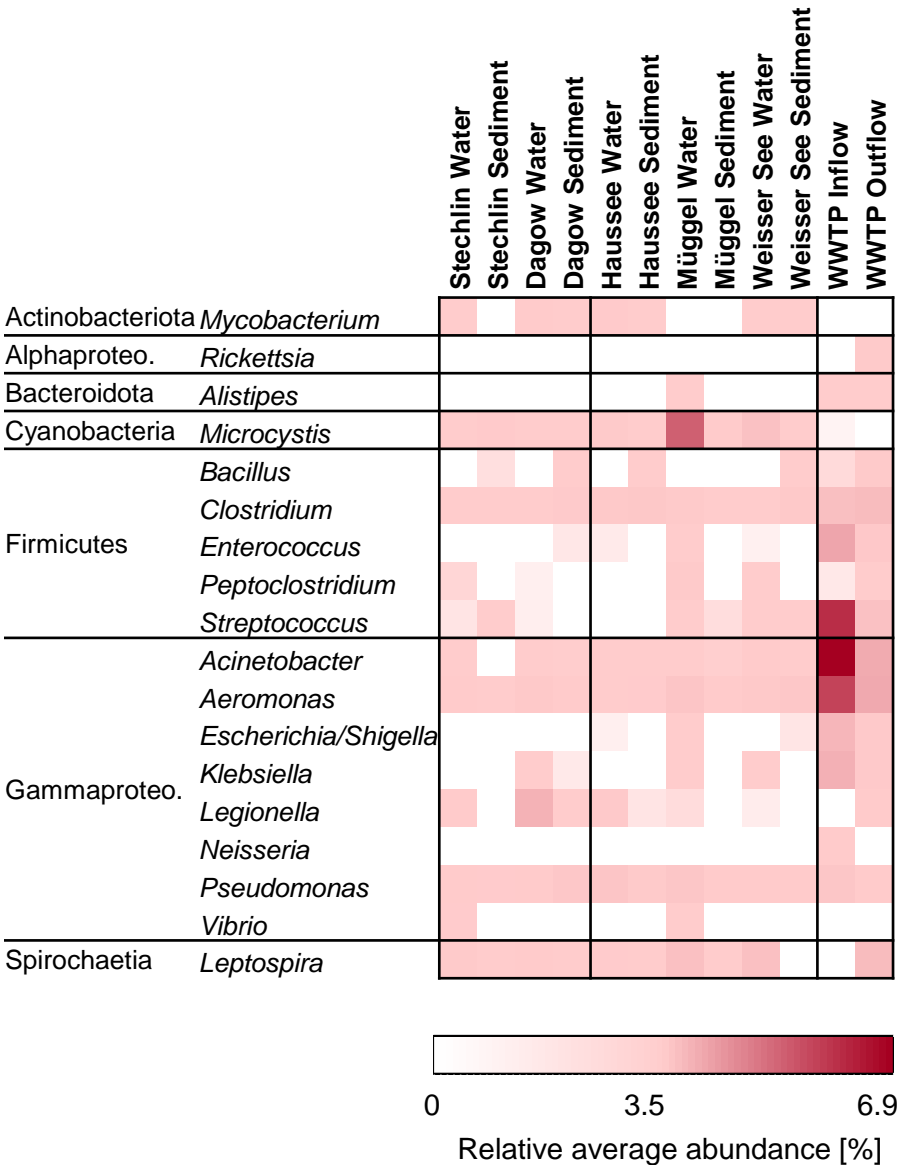

b. Correlation with specific sub-communities and their prevalence

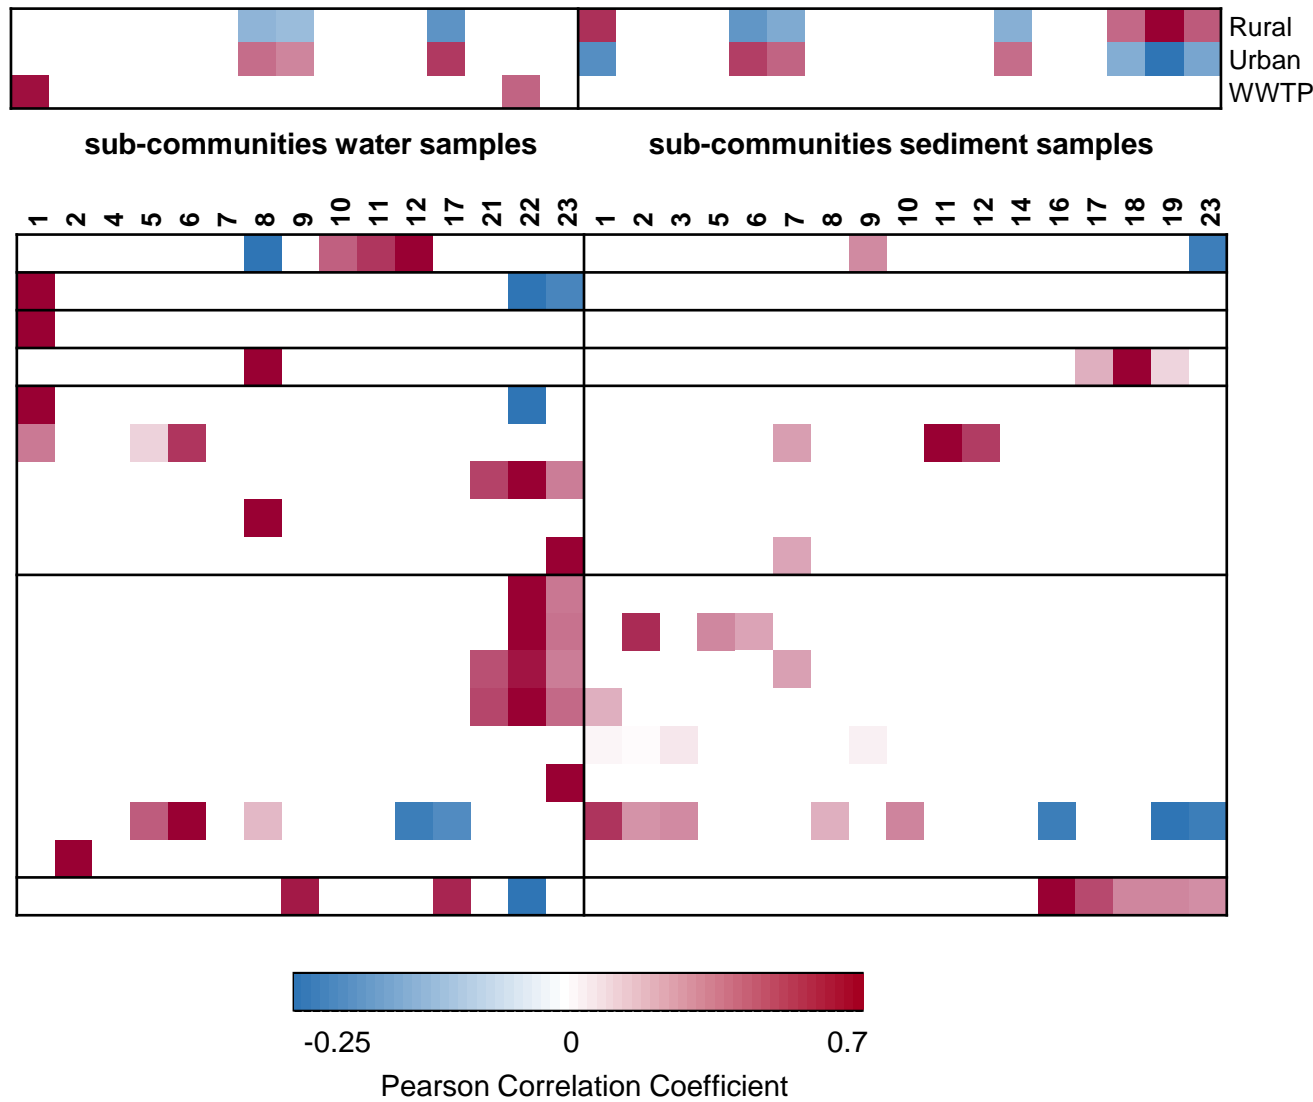

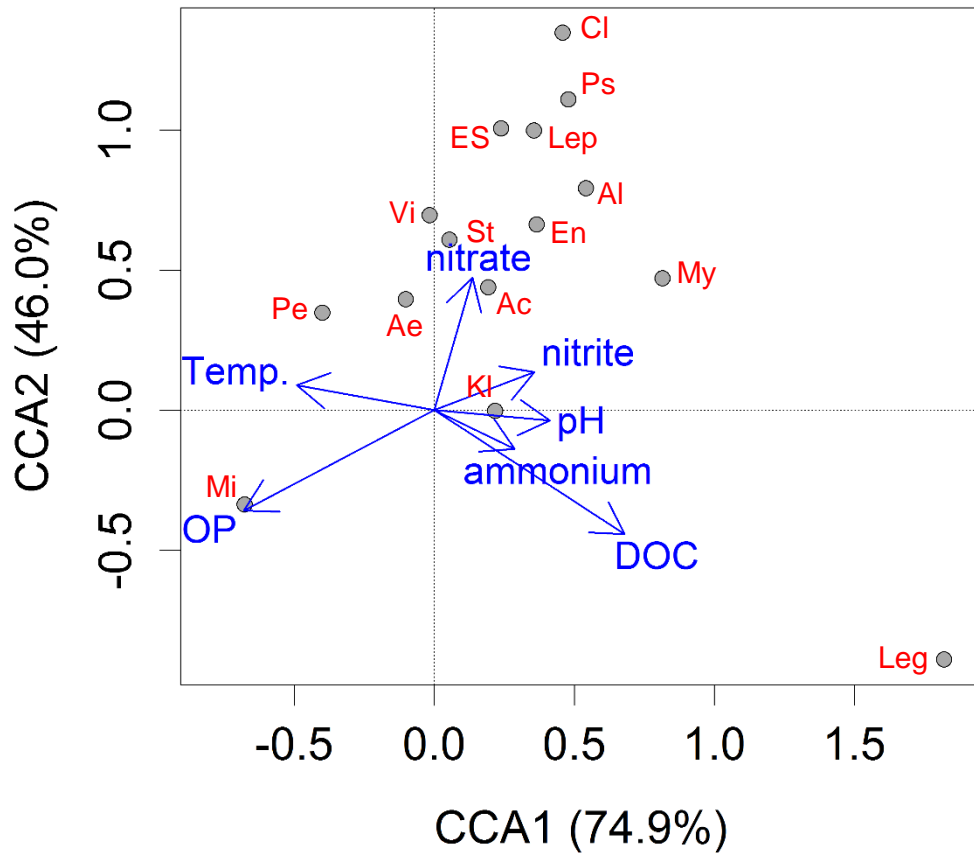

Source: https://www.biorxiv.org/content/10.1101/2020.06.26.173328v2.full.pdf
